# Supplementary material
Source: PubMed Central journal article supplement (PMC4751996)
Supplement: NIHMS756981-supplement-Supporting_info.pdf [file NIHMS756981-supplement-Supporting_info.pdf]

# Identification of non-nucleoside human ribonucleotide reductase modulators

Md. Faiz Ahmad<sup>1</sup>§, Sarah E Huff<sup>2</sup>§, John Pink<sup>3</sup>, Intekhab Alam<sup>1</sup>, Andrew Zhang<sup>1</sup>, Kay Perry<sup>4</sup>, Michael E. Harris<sup>5</sup>, Tessianna Misko<sup>1</sup>, Suheel K. Porwal<sup>8</sup>, Nancy L. Oleinick<sup>3,6</sup>, Masaru Miyagi<sup>9</sup>, Rajesh Viswanathan<sup>2</sup>, Chris Godfrey Dealwis<sup>\*1,7</sup>

## SUPPORTING INFORMATION

Table of Contents

|                                                                                                                     |            |
|---------------------------------------------------------------------------------------------------------------------|------------|
| <b>Experimental section</b> .....                                                                                   | <b>2-7</b> |
| Virtual Screening of the Cincinnati library against hRRM1 .....                                                     | 2          |
| Ribonucleotide Reductase inhibition assays.....                                                                     | 3          |
| Growth inhibition screening assays protocols.....                                                                   | 4-5        |
| Crystallization protocols.....                                                                                      | 6          |
| Gel filtration chromatography protocols.....                                                                        | 7          |
| <b>Tables and Figure Legends</b> .....                                                                              | <b>7</b>   |
| Table S1. Docking scores for SYBYL and Schrödinger virtual screening software and fluorescence quenching data. .... | 7          |
| Table S2. Medicinal Chemistry data.....                                                                             | 23-25      |
| Table S3. IC50 measurements of the ten lead compounds.....                                                          | 26         |
| Table S4. Synopsis of growth inhibition data for all compounds tested in MDA-MB-231 and HCT-116 cell lines.....     | 26         |
| Table S5. Median effect doses (Dm) for <b>Compound 1</b> .....                                                      | 26         |
| Table S6. Interactions between the <b>Compound 4</b> (Phthalimide) and the neighboring atoms in hRRM1 .....         | 27-29      |
| Table S7. HRMS Data for Compounds <b>1-10</b> .....                                                                 | 29         |
| Figure S1. Nonspecific and artificial inhibition controls for fluorescence quenching.....                           | 30         |

|                                                                               |    |
|-------------------------------------------------------------------------------|----|
| Figure S2. <sup>1</sup> H-NMR data .....                                      | 31 |
| Figure S3. <b>Compound 4</b> is a noncompetitive inhibitor of hRRM1.....      | 39 |
| Figure S4. Docking Poses for Compounds <b>1-10</b> .....                      | 40 |
| Figure S5. K <sub>D</sub> determination for Compounds <b>1, 4, 6, 8</b> ..... | 50 |
| <b>References</b> .....                                                       | 51 |

## EXPERIMENTAL SECTION

### Virtual screening of the Cincinnati library against hRRM1

In order to conduct virtual screening against hRRM1 we used a homology model of the dATP-induced hexamer, that was based on the *S.cerevisiae* hexamer structure (Fig 2A main text, <sup>1</sup>). The model was made by substituting the hRRM1 sequence onto the *S.cerevisiae* structure followed by energy minimization in Prime using OPLS force field.

### Docking with Schrödinger

*In silico* docking of the University of Cincinnati drug library was performed using the Glide docking module of the Schrodinger 9.3 modeling software suite <sup>2</sup>. The hRRM1 hexamer structure was first refined using Prime. Common problems associated with modeling crystal structures, such as missing hydrogen atoms, incomplete side chains and loops, ambiguous protonation states, and flipped residues, are resolved before docking. Prime uses the Optimized Potentials for Liquid Simulations All-Atom (OPLS) force field and the Surface generalized Born (SGB) continuum solution model for optimization and minimization. Likewise, the Ligprep program was used to generate 3D structures from the 2D drug library using OPLS 2001 force field. Once the drug library and the protein structure were prepared, docking was performed with Glide through the virtual screening workflow provided in Maestro, narrowing the hits to the top

10% through each step of the screening process. The final Glide XP results were kept and analyzed by docking score. The hits were scored using a docking function and a glide scoring function (glide score). The docking function is comprised of a linear combination of nonlinear functions of entropic, solvation, steric and polar effects <sup>2</sup>. The Schrödinger docking score is such that more negative values reflect stronger binding. Docking scores of -5 are generally considered moderate binders, while compounds with scores of -10 are considered very strong binders. Top hits were visually inspected for interactions with the binding pocket. When determining hits, we carefully examined the docking poses (Fig S4) where common interactions were a good indication of a consensus binding site. For example, residues Ile 44, Gln 45, Met 1, His 2, Val 51, and Val 43 interact with all ten compounds in Table 1, which is a good indication that they are binding at the same site.

### **Ribonucleotide reductase inhibition assays**

The specific activity of hRR was determined using *in vitro* <sup>14</sup>C-ADP reduction assays as previously described <sup>1,3</sup>. The iron was loaded into the small subunit of RR as follows. The buffer solution (50 mM HEPES at pH 7.6, 5% (v/v) glycerol, 0.1M KCl) and the hRRM2 protein in the buffer solution were prepared under deoxygenated conditions. Both solutions were taken into the glove box and FeNH<sub>4</sub>SO<sub>4</sub> was dissolved in the buffer solution. 5 equivalents of Fe (II) per hRRM2 dimer from FeNH<sub>4</sub>SO<sub>4</sub> (determined by Ferrozine assay) was added to the protein solution and incubated at 4°C in the glove box. Upon removal of the protein from the glove box, freshly prepared O<sub>2</sub>-saturated buffer solution (50 mM HEPES at pH 7.6, 5% (v/v) glycerol, 0.1M KCl) was added. Excess iron was removed by S200 10/300 size exclusion chromatography. To determine the specific activity of hRRM1 we used a reaction mixture containing 0.3 μM hRRM1

and 2.1  $\mu\text{M}$  hRRM2 in an activity assay buffer of 50 mM HEPES pH 7.6, 15 mM  $\text{MgCl}_2$ , 1 mM EDTA, 100 mM KCl, 5 mM DTT, 3 mM ATP, 100  $\mu\text{M}$  dGTP and 1 mM  $^{14}\text{C}$ -ADP (~3000 cpm/nmol). The reaction mixture was pre-incubated for 3 min at 37°C, and 30  $\mu\text{L}$  aliquots were sampled at fixed time intervals after initiating the reaction. Reactions were quenched by immersion in a boiling water bath, cooling, and treatment with alkaline phosphatase. The product  $^{14}\text{C}$ -dADP that formed during the reaction was separated from substrate  $^{14}\text{C}$ -ADP using boronate affinity chromatography<sup>3</sup>.  $^{14}\text{C}$ -dADP was quantified by liquid scintillation counting using a Beckman LS6500 liquid scintillation counter. Since most of our compounds were dissolved in 100% DMSO, the loss of activity due to 0.2% DMSO, which is the final concentration of DMSO in the activity assay, was determined to be less than 1%, suggesting that it is almost negligible. The  $\text{IC}_{50}$  was defined as the concentration of any compound that reduced the specific activity of hRRM1 to 50% of the control activity. Since we had a limited amount of compound from the Cincinnati library available, we adopted a two-point method for  $\text{IC}_{50}$  determination using the procedure described in Krippendorff 2007 *et. al.*,<sup>4</sup>. Based on this method, we used 5 and 25  $\mu\text{M}$  concentrations of the ligand for measuring the  $\text{IC}_{50}$ . All ligands tested were obtained from the University of Cincinnati chemical library as a 30 mM solution in 100% DMSO. The GRI Numbers, molecular weight, and the original manufacturer's source are listed for the each compound in Table S2. All structures provided are rendered with their specific stereochemistry identified unless the stereochemistry is unknown. Mass spectrometry analysis was performed using a LTQ-Orbitrap Velos mass spectrometer equipped with an electrospray ion source (Thermo-Finnigan, Bremen, Germany). The samples in 0.1% formic acid and 50% acetonitrile were introduced into the ion source at a flow rate of 5  $\mu\text{L}/\text{min}$  and the full MS spectra of the produced ions were acquired at a resolution of 60,000 in the positive ion mode.

## **Inhibition mechanism**

RR inhibition assays were performed as previously described for wt hRRM1 at inhibitor concentrations of 0, 32, and 64  $\mu\text{M}$  of **Compound 4**. For all three inhibitor concentrations, the specific activity was recorded for substrate concentrations of 5, 1, 0.5, 0.2, 0.1, and 0.05 mM of  $^{14}\text{C}$ -ADP. Each data set was recorded in duplicates. The velocity of each reaction was plotted against concentration of substrate and analyzed by the mixed-model equation in GraphPad Prism 6. The parameters  $V_{\text{max}}$ ,  $K_m$ ,  $K_i$  and  $\alpha$  were constrained to be shared for all inhibitor concentrations. The mechanism of inhibition was determined by the alpha value, where  $\alpha = 1$  denotes noncompetitive inhibition,  $\alpha \gg 1$  denotes competitive inhibition, and  $\alpha \ll 1$  denotes uncompetitive inhibition. A double reciprocal plot was also generated for the data set in GraphPad.

## **Growth Inhibition screening assays for determining cellular toxicity**

Cells were maintained in standard tissue culture media (RPMI1640, + 10% fetal bovine serum, plus antibiotic) and grown in a standard humidified 5%  $\text{CO}_2$  incubator at  $37^\circ\text{C}$ . Cells were regularly tested using the MycoAlert detection kit (Lonza Biologics) and shown to be mycoplasma-free. Initial compound screening was performed using both MDA-MB-231 (a generous gift of Dr. V.C. Jordan) and HCT-116 (a generous gift of Dr. Sandy Markowitz) cell lines. For moderate throughput screening (up to 120 drugs per experiment), cells were seeded into 96 well plates and allowed to attach overnight. The following day media was removed and replaced with fresh compound containing media. Each compound was tested against both cell lines at 3 concentrations; 1 $\mu\text{M}$ , 10 $\mu\text{M}$  and 50 $\mu\text{M}$ , in duplicate. Cells were incubated with compound containing media for three days in a standard 5%  $\text{CO}_2$  tissue culture incubator. Cell growth was assessed after 3 days using the DNA dye binding assay, as originally described by

LaBarca and Paigen<sup>5</sup>. Relative growth was independently calculated for each cell line, based on DNA content from corresponding cells grown in control media plus diluent (DMSO). Additional growth inhibition experiments utilized either the DNA binding assay or the Promega CellTiter 96<sup>®</sup> (MTT reduction) assay, with similar results. For detailed growth inhibition assays, cells (1500-2500 depending on the growth characteristics of the cell line) were seeded in standard 96 well tissue culture plates and allowed to attach overnight. The following day media was removed and replaced with drug containing media. Each dose group consisted of 5 replicate wells, and results are reported as Relative Growth, calculated as DNA or MTT reduction per well, divided by the signal from untreated cells, both harvested 3 days after drug administration.

For the combination experiments a constant dose of **Compound 1** was co-administered with a standard dose range of gemcitabine. The dose of **Compound 1** used was the highest dose tested in each cell line that showed minimal or no growth inhibition as a single agent. Median effect doses (Dm) were calculated using Calcsyn version 2.0.

### **Crystallization of hRRM1**

hRRM1 was crystallized in the orthorhombic P2<sub>1</sub>2<sub>1</sub>2<sub>1</sub> space group by the hanging drop vapor diffusion method at room temperature. Briefly, the well solution for crystallizations contained 0.1 M TRIS pH 7.9, 0.2 M Li<sub>2</sub>SO<sub>4</sub>, and 19% PEG-3350. The hanging drops contained 1 µL of protein solution at 20 mg/ml in 50 mM TRIS pH 8.0, 5% glycerol, 5 mM MgCl<sub>2</sub>, 10 mM DTT, 20 mM TTP and 1 µL of the well solution. Initial co-crystallization attempts with **Compound 4** (a phthalamide derivative) did not yield any co-crystals. Hence we resorted to the soaking method. We used 100-500 µM compound in our soaking experiment. Crystals were incubated for 1-2h in reservoir solution containing 19% polyethylene glycol 3350, 0.2 M Li<sub>2</sub>SO<sub>4</sub> and 100 mM Tris pH 7.9 with 100 -500 µM **Compound 4**. Subsequently, crystals were transferred to cryo-

protectant buffer (well solution + 20% glycerol) and then flash frozen in liquid nitrogen for data collection.

### **Data collection and structure determination**

The data were collected from a flash-cooled crystal at cryogenic temperatures at the NECAT 24IDE beam line at the Advanced Photon Source using an ADSC Quantum-315 CCD detector. All the crystals belong to the orthorhombic space group  $P2_12_12_1$ , with unit cell parameter given in Table S6. The data were integrated and scaled using HKL 2000<sup>6</sup>. The complex crystals are all isomorphous to the native  $P2_12_12_1$  form (Protein Data Bank codes: 3HNC) and the structure was directly determined by the difference Fourier technique. The graphic software Coot<sup>7</sup> was used for model building interspersed with refinement using REFMAC5/PHENIX<sup>8</sup>. The final models were evaluated with PROCHECK<sup>9</sup>. The electron density for ligands was confirmed by calculating omit maps using the program PHENIX<sup>8b,10</sup>. Figures were prepared in PyMOL<sup>11</sup>.

### **Gel filtration chromatography**

Gel filtration chromatography was conducted using a Superdex 10/300 GL column (GE Healthcare) containing a bed volume of 24 mLs. The column was equilibrated with two column volumes or more containing Buffer A (50mM Tris, pH 8.0, 5mM MgCl<sub>2</sub>, 5% glycerol, 0.1 M KCl, 5mM DTT). Once a stable baseline was observed, hRRM1 samples at 10 μM were injected to obtain its chromatograph without nucleotide. To investigate the impact of the phthalimide compound (Table 1 main text, **Compound 4**) on oligomerization this inhibitor was incubated with hRMM1 at a concentration of 1mM prior to injection. The concentration of 1mM is approximately 30 times greater than its IC<sub>50</sub> for hRRM1. It was felt that such a high concentration was needed to reduce the impact of the dilution, because the compound was not

present in the equilibration buffer. The compound's impact on the dATP-induced oligomers was studied by incubating the compound with 50  $\mu\text{M}$  dATP. For a control independent chromatographs were generated where only dATP was present at 50  $\mu\text{M}$  concentrations. The column was calibrated using a low molecular weight standard as described <sup>12</sup>

## **Tables and Figures**

**Table S1:** Docking scores for the remaining 76 hits after 18 PAINS were eliminated from the top 94 hits. The SYBYL and Schrödinger docking scores are reported as well as the percent quenching. Hits are ranked in descending order of SYBYL Surflex docking score. Quenching greater than 25% was used as the cutoff benchmark for establishing binding.



| GRI Number | Structure                                                                           | SYBYL Docking Score | Schrodinger Score | Percent Quenching |
|------------|-------------------------------------------------------------------------------------|---------------------|-------------------|-------------------|
| 187884     | 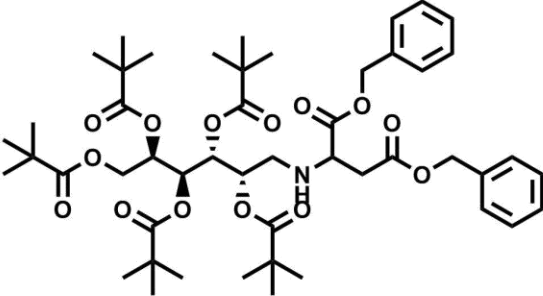   | 9.57                | -4.867            | 27                |
| 95889      |    | 9.18                | -5.699            | 32                |
| 99069      |   | 9.14                | -5.399            | No quenching      |
| 299934     |  | 9.07                | -4.155            | 11                |
| 257518     |  | 8.89                | -4.082            | 10                |
| 156769     |  | 8.85                | -4.717            | 20                |

|        |                                                                                     |      |          |                 |
|--------|-------------------------------------------------------------------------------------|------|----------|-----------------|
| 169994 | 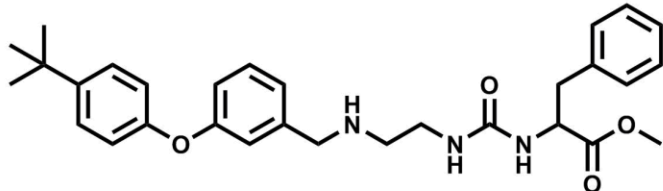   | 8.69 | -4.942   | 15              |
| 169979 |    | 8.59 | -5.504   | 29              |
| 171956 |   | 8.45 | -4.871   | Not significant |
| 382907 |  | 7.01 | -5.08421 | 10              |
| 95946  |  | 8.39 | -4.59    | 33              |
| 95905  |  | 8.27 | -3.875   | 11              |

|        |                                                                                     |      |        |              |
|--------|-------------------------------------------------------------------------------------|------|--------|--------------|
| 172757 | 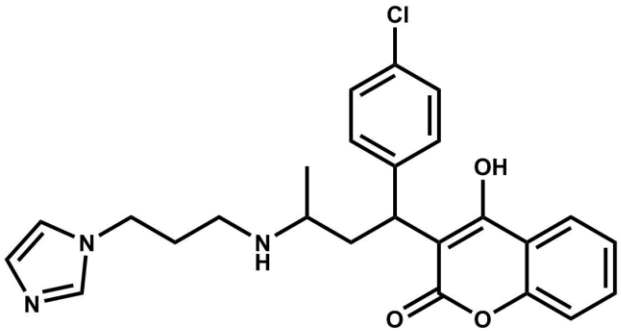   | 8.24 | -4.701 | No quenching |
| 97679  |    | 8.19 | -5.042 | 43           |
| 184527 |   | 8.17 | -4.951 | 10           |
| 187629 |  | 8.15 | -5.035 | 15           |
| 170032 |  | 8.11 | -5.334 | 22           |

|        |                                                                                     |      |          |                 |
|--------|-------------------------------------------------------------------------------------|------|----------|-----------------|
| 100207 | 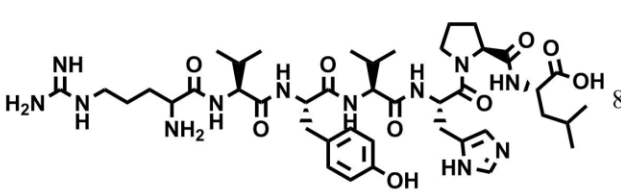   | 8.07 | -5.365   | No quenching    |
| 184612 |    | 8.07 | -4.931   | No quenching    |
| 170479 |   | 8.05 | -3.537   | 10              |
| 99090  |  | 8    | -4.632   | Not significant |
| 155516 |  | 7.06 | -3.8609  | 38              |
| 170870 |  | 7.96 | -4.40748 | 45              |

|        |                                                                                     |      |          |                 |
|--------|-------------------------------------------------------------------------------------|------|----------|-----------------|
| 187931 | 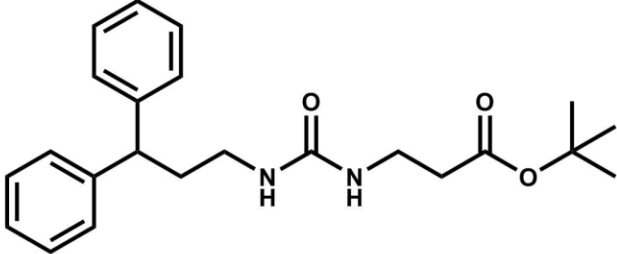   | 7.96 | -3.6226  | Not significant |
| 13425  |    | 7.92 | -5.02586 | 20              |
| 186054 |   | 7.91 | -5.36133 | 18              |
| 261191 |  | 7.91 | -3.94716 | 10              |
| 99072  |  | 7.89 | -6.88018 | Not significant |

|        |                                                                                     |      |          |                 |
|--------|-------------------------------------------------------------------------------------|------|----------|-----------------|
| 170096 | 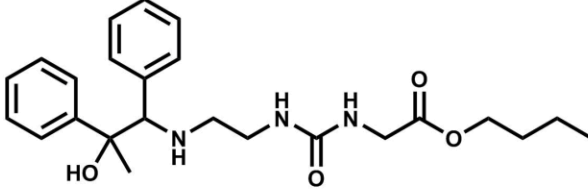   | 7.89 | -3.61111 | No quenching    |
| 96005  |    | 7.88 | -5.76766 | Not significant |
| 97567  |    | 7.88 | -5.76766 | No quenching    |
| 182759 |   | 7.88 | -6.50553 | 15              |
| 251968 |  | 7.85 | -4.50142 | 45              |
| 9370   |  | 7.13 | -6.00874 | 25              |

|        |                                                                                     |      |          |              |
|--------|-------------------------------------------------------------------------------------|------|----------|--------------|
| 99364  | 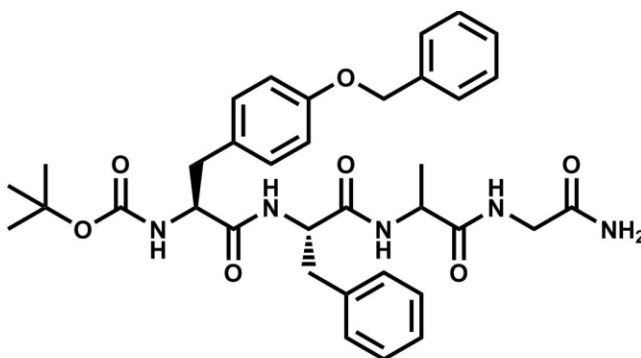   | 7.84 | -6.43763 | 5            |
| 100204 |    | 7.81 | -4.03208 | No quenching |
| 185598 |   | 7.78 | -3.67326 | No quenching |
| 190714 |  | 7.78 | -4.6568  |              |
| 296755 |  | 7.78 | -1.43685 | 23           |

|        |                                                                                     |      |          |                 |
|--------|-------------------------------------------------------------------------------------|------|----------|-----------------|
| 170802 | 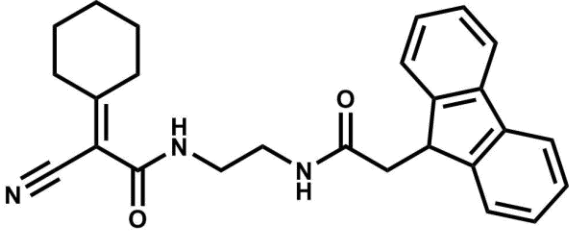   | 7.77 | -2.03396 | 50              |
| 128346 |    | 7.76 | -6.86047 | 22              |
| 265472 |   | 7.73 | -4.585   | No quenching    |
| 279644 |  | 7.73 | -5.79402 | 10              |
| 98467  |  | 7.72 | -1.29271 | Not significant |



|        |                                                                                     |      |          |                 |
|--------|-------------------------------------------------------------------------------------|------|----------|-----------------|
| 157875 | 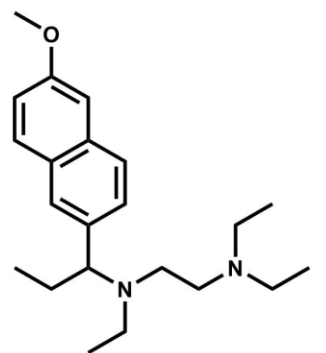   | 7.7  | -5.91556 | No quenching    |
| 188275 |    | 7.67 | -2.60787 | 50              |
| 99625  |   | 7.65 | -6.31025 | 22              |
| 188109 |  | 7.18 | -3.59204 | Not significant |
| 100604 |  | 7.22 | -4.9972  | 20              |
| 96592  |  | 7.62 | -3.40964 | 18              |

|        |                                                                                     |      |          |                 |
|--------|-------------------------------------------------------------------------------------|------|----------|-----------------|
| 188109 | 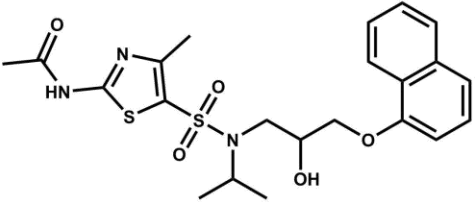   | 7.18 | -3.59204 | Not significant |
| 100604 |    | 7.22 | -4.9972  | 20              |
| 96592  |    | 7.62 | -3.40964 | 18              |
| 170674 |    | 7.54 | -3.10278 | 15              |
| 182733 |   | 7.53 | -5.04449 | 25              |
| 170317 |  | 7.52 | -4.94688 | 20              |
| 193840 |  | 7.52 | -6.8291  | 15              |

|        |                                                                                     |      |          |                 |
|--------|-------------------------------------------------------------------------------------|------|----------|-----------------|
| 312977 | 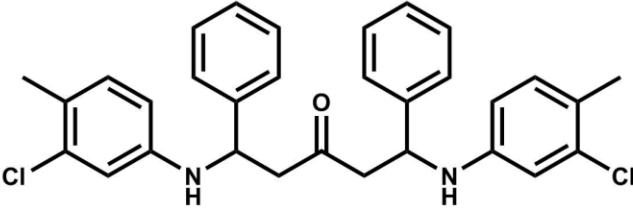   | 7.48 | -4.96725 | 20              |
| 184956 |    | 7.47 | -1.97039 | Not significant |
| 187558 |   | 7.45 | -4.77675 | 15              |
| 258482 |  | 7.45 | -4.63639 | 18              |
| 184019 |  | 7.44 | -6.4521  | 22              |
| 265485 |  | 7.4  | -4.98476 | 32              |

|        |                                                                                     |      |          |                 |
|--------|-------------------------------------------------------------------------------------|------|----------|-----------------|
| 187086 | 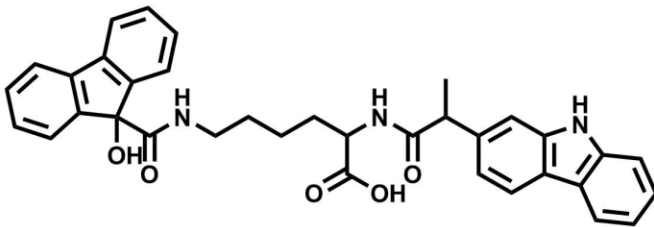   | 7.39 | -7.21694 | 10              |
| 188831 |    | 7.39 | -8.02652 | 21              |
| 154330 |    | 7.38 | -5.81937 | 18              |
| 308759 |   | 7.38 | -4.82741 | Not significant |
| 99123  |  | 7.37 | -5.5936  | 33              |
| 150788 |  | 7.37 | -6.19569 | 15              |

|        |                                                                                     |      |          |              |
|--------|-------------------------------------------------------------------------------------|------|----------|--------------|
| 93082  | 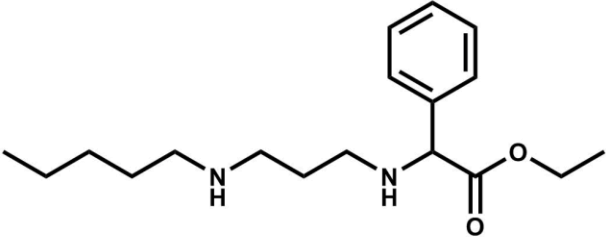   | 7.36 | -4.63786 | 10           |
| 100201 |    | 7.36 | -2.0712  | 9            |
| 183652 |    | 7.36 | -6.03565 | 33           |
| 384775 |   | 7.36 | -5.14933 | 30           |
| 157794 |  | 7.35 | -3.03283 | 21           |
| 95907  |  | 7.34 | -5.02586 | No quenching |

|        |                                                                                   |      |          |    |
|--------|-----------------------------------------------------------------------------------|------|----------|----|
| 100033 | 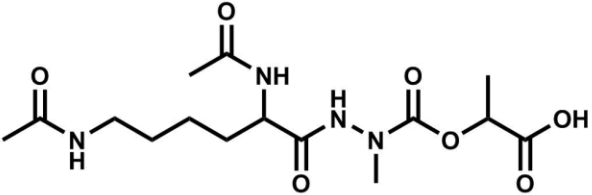 | 7.34 | -4.9311  | 11 |
| 258921 |  | 7.34 | -4.70569 | 25 |
| 146855 |  | 7.32 | -4.10071 | 16 |

**Table S2:** Medicinal chemistry data. Chemical names, structures, molecular weight, AlogP, and polar surface area are provided for each class of inhibitor identified in screening against hRRM1.

| GRI Number <sup>a</sup> | Chemical Name                                                                                                                    | Chemical Class (Compound # and abbreviation)                                                                      | Molecular Weight | AlogP | Polar Surface Area |
|-------------------------|----------------------------------------------------------------------------------------------------------------------------------|-------------------------------------------------------------------------------------------------------------------|------------------|-------|--------------------|
| 193480                  | 3,3'-(1,4-phenylenebis(oxy))bis(1-(4-(9H-fluoren-9-yl)piperazin-1-yl)propan-2-ol)                                                | 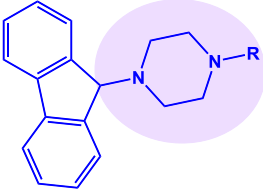<br>Compound 1 (PB-Piperazine)   | 722.9136         | 6.735 | 71.9               |
| 190941                  | (S)-tetrahydrobenzo[b]thiophen-4-ylamino-acetamido-diethylmalonate                                                               | <br>Compound 2 (tetraHThioDIM)   | 368.4479         | 1.435 | 121.97             |
| 95946                   | (S)-2,4-diamino-N-tetradecylbutanamide                                                                                           | <br>Compound 3 (S-DiTDB)       | 313.5218         | 3.671 | 81.1               |
| 183652                  | N6-(2-(1,3-dioxisoindolin-2-yl)acetamido)-2-methylpropanoyl)-N2-(4,4,4-trifluoro-3-hydroxy-3-(trifluoromethyl)butanoyl)-L-lysine | <br>Compound 4 (OxolsolndoLys) | 626.5022         | 1.161 | 182.2              |
| 384775                  | (2,4-di-tert-pentylphenoxy)-N-butyl hydroxy (4-nitrophenoxy) naphthamide                                                         | <br>Compound 5 (ButHyNitNap)  | 612.7551         | 9.146 | 113.6              |

<sup>a</sup> - Univ. of Cincinnati Compound Library reference number

| GRI Number <sup>a</sup> | Chemical Name                                                                                                          | Chemical Class<br>(Compound # and abbreviation)                                                               | Molecular Weight | AlogP  | Polar Surface Area |
|-------------------------|------------------------------------------------------------------------------------------------------------------------|---------------------------------------------------------------------------------------------------------------|------------------|--------|--------------------|
| 188275                  | diethylaminoethyl<br>(E) phenylvinyl<br>-sulfonamido-<br>propoxybenzoate                                               | 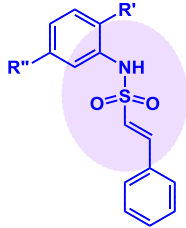<br>Compound 6 (DPSP)        | 460.5863         | 3.807  | 93.3               |
|                         |                                                                                                                        |                            |                  |        |                    |
| 97679                   | N-methylglycyl-<br>L-arginyl-L-valyl-<br>L-tyrosyl-L-<br>valyl-L-histidine                                             | <br>Compound 7 (NmetGAVTVH) | 743.8535         | -3.941 | 305.6              |
| 265485                  | (3,5-bis(benzyloxy)<br>phenyl-ethyl)<br>amino pentanol                                                                 | <br>Compound 8 (BoPEAP)     | 419.5558         | 5.438  | 50.7               |
|                         |                                                                                                                        |                           |                  |        |                    |
| 166796                  | methyl 5-((R)-1-<br>((2-((R)-3-acetoxy-<br>5-ethoxy-5-<br>oxopentanamido)ethyl)-<br>amino)ethyl)-<br>2-hydroxybenzoate | <br>Compound 9 (AEOHydBen) | 438.4715         | 0.839  | 140.3              |
|                         |                                                                                                                        |                          |                  |        |                    |
| 95889                   | methyl palmitoyl-<br>Llysyl-L-lysinate                                                                                 | <br>Compound 10 (MePAMLL) | 526.7952         | 5.548  | 136.5              |
|                         |                                                                                                                        |                          |                  |        |                    |

<sup>a</sup> - Univ. of Cincinnati Compound Library reference number



**Sample preparation for Compounds 1-10 screened in this study:**

| GRI number <sup>a</sup><br>(originating source) | Chemical Name                                                                                                                                                 | Molecular Weight<br>(parent) | Compound #<br>in this manuscript | Comments for sample preparation                 |
|-------------------------------------------------|---------------------------------------------------------------------------------------------------------------------------------------------------------------|------------------------------|----------------------------------|-------------------------------------------------|
| <b>384775</b><br>(Salor)                        | (2,4-di-tert-pentylphenoxy)-N-butyl hydroxy (4-nitrophenoxy) naphthamide                                                                                      | 612.7551                     | Compound <b>5</b>                | <b>BHNaphthamide</b>                            |
| <b>265485</b><br>(Panlabs)                      | (3,5-bis(benzyloxy)phenylethyl)amino pentanol                                                                                                                 | 419.5558                     | Compound <b>8</b>                | <b>BoPEAP</b>                                   |
| <b>193840</b><br>(Asinex)                       | 3,3'-(1,4-phenylenebis(oxy))bis(1-(4-(9H-fluoren-9-yl)piperazin-1-yl)propan-2-ol)                                                                             | 722.9136                     | <b>Compound 1</b>                | Obtained as a powder and was dissolved in DMSO. |
| <b>169979</b><br>(Panlabs)                      | methyl 5-((R)-1-((2-((R)-3-acetoxy-5-ethoxy-5-oxopentanamido)ethyl)amino)ethyl)-2-hydroxybenzoate                                                             | 438.4715                     | Compound <b>9</b>                | <b>AEOHydBen</b>                                |
| <b>183652</b><br>(Panlabs)                      | N <sup>6</sup> -(2-(2-(1,3-dioxoisindolin-2-yl)acetamido)-2-methylpropanoyl)-N <sup>2</sup> -(4,4,4-trifluoro-3-hydroxy-3-(trifluoromethyl)butanoyl)-L-lysine | 626.5022                     | Compound <b>4</b>                | <b>Hexafluoro Lys Phthalimide</b>               |
| <b>95889</b><br>(unknown)                       | methyl palmitoyl-Llysyl-L-lysinate                                                                                                                            | 526.7952                     | Compound <b>10</b>               | <b>MePAMLL</b>                                  |
| <b>188275</b><br>(Panlabs)                      | diethylaminoethyl (E) phenylvinyl-sulfonamido-propoxybenzoate                                                                                                 | 460.5863                     | Compound <b>6</b>                | <b>DPS Benzoate</b>                             |
| <b>97679</b><br>(unknown)                       | N-methylglycyl-L-arginyl-L-valyl-L-tyrosyl-L-valyl-L-histidine                                                                                                | 743.8535                     | Compound <b>7</b>                | <b>NmetGAVTVH</b>                               |
| <b>95946</b><br>(unknown)                       | (S)-2,4-diamino-N-tetradecylbutanamide                                                                                                                        | 313.5218                     | Compound <b>3</b>                | <b>S-DiaminoTDBamide</b>                        |
| <b>190941</b><br>(Panlabs)                      | (S)-tetrahydrobenzo[b]thiophen-4-yl)amino-acetamido-diethylmalonate                                                                                           | 368.4479                     | Compound <b>2</b>                | <b>tetraHThioDIM</b>                            |

**Compound 1** (GRI# 193840) was obtained from U. of Cincinnati small molecule library as a white solid and was used after dissolving in DMSO. It was originally obtained from the

**Table S3: IC<sub>50</sub> measurements of the ten compounds listed in Table 1. See Experimental Methods for the protocol used for deriving IC<sub>50</sub> values.**

| Specific Activity (nmol min <sup>-1</sup> mg <sup>-1</sup> ) |        |        |        |        |                |        |        |        |               |                   |
|--------------------------------------------------------------|--------|--------|--------|--------|----------------|--------|--------|--------|---------------|-------------------|
| Compound                                                     | wt R1  | 5uM    | 5uM    | 5uM    | Avg<br>(5μM)   | 100uM  | 100uM  | 100 uM | Avg<br>(50μM) | Estimated<br>IC50 |
| 1                                                            | 103.9  | 63.89  | 64.2   | 66.1   | 64.73          | 43.07  | 42.63  | 40.9   | 42.2          | 23.9              |
| 2                                                            | 259.81 | 177.23 | 172.93 | 177.02 | 175.73         | 155.94 | 159.87 | 162.66 | 159.49        | 61.74             |
| 3                                                            | 303.2  | 261.08 | 256.33 | 251.79 | 256.4          | 150.87 | 147.6  | 149.43 | 149.3         | 47.2              |
| 4                                                            | 209.3  | 155.9  | 157.3  | 158.7  | 157.3          | 90.1   | 86.7   | 86.6   | 87.8          | 32.3              |
| 5                                                            | 100.0  | 85.7   | 82.9   | 81.9   | 83.5           | 23.4   | 22.6   | 22.2   | 22.74         | 21.8              |
| 6                                                            | 173    | 100    |        |        | 100            | 128.9  |        |        | 128.9         | 44.0              |
| 7                                                            | 227.31 | 129.5  | 126.8  | 127.46 | 127.92         | 103.2  | 100.9  | 97.4   | 100.49        | 23.6              |
| 8                                                            | 115.78 | 74.6   | 69.84  | 70.93  | 71.79          | 47.62  | 45.55  | 47.26  | 46.81         | 23.6              |
| 9                                                            | 170.58 | 98.71  | 100.52 | 97.8   | 99.01          | 80.24  | 77.86  | 80.01  | 79.37         | 27.2              |
| 10                                                           | 204.3  | 147.65 | 151.23 | 148.42 | 149.1          | 94.18  | 92.71  | 94.51  | 93.8          | 35.7              |
|                                                              | wt R1  | 100uM  | 100uM  | 100uM  | Avg<br>(100uM) | 10mM   | 10mM   | 10mM   | Avg<br>(10mM) | Estimated<br>IC50 |
| Hydroxyurea                                                  | 126.46 |        |        |        | 102.57         |        |        |        | 67.16         | 10<br>76          |

**Table S4:** Synopsis of growth inhibition data for all compounds tested in MDA-MB-231 and HCT-116 cell lines.

| Effects                | Dose | % Drugs Tested |
|------------------------|------|----------------|
| >50% Growth Inhibition | 1μM  | 0.00%          |
| >50% Growth Inhibition | 10μM | 8.51%          |
| >50% Growth Inhibition | 50μM | 36.17%         |
| <50% Growth Inhibition | 50μM | 63.83%         |

**Table S5:** Median effect doses (Dm) for **Compound, 1**

|                   | <b>193840</b>  | <b>Gemcitabine</b> | <b>Gem + 193840</b>             |
|-------------------|----------------|--------------------|---------------------------------|
|                   | <b>Dm (μM)</b> | <b>Dm (μM)</b>     | <b>Dm (μM)</b>                  |
| <b>MDA-MB-231</b> | 12.241         | 0.916              | 0.096<br><i>(2.5 μM 193840)</i> |
| <b>A549</b>       | 8.780          | 0.457              | nd                              |
| <b>Panc1</b>      | 7.473          | 0.615              | nd                              |
| <b>HCT116</b>     | 2.045          | 0.725              | 0.155<br><i>(1.0 μM 193840)</i> |

**Table S6:** Interactions between **Compound 4** (Phthalimide) and the neighboring atoms in hRRM1. The contacts were found by using a 5 Å cutoff distance. **Compound 4** is designated by chain 1(FFF). The contacts were found by using a 5 Å cut off distance.

1/D/ 1(FFF). / C [ C]: /1/A/ 14(MET). / N [ N]: 4.91  
 /1/D/ 1(FFF). / N1 [ N]: /1/A/ 49(ALA). / N [ N]: 4.66  
     /1/A/ 49(ALA). / CA [ C]: 4.63  
 /1/D/ 1(FFF). / O1 [ O]: /1/A/ 48(ALA). / CA [ C]: 4.27  
     /1/A/ 48(ALA). / C [ C]: 4.28  
     /1/A/ 48(ALA). / CB [ C]: 3.30  
     /1/A/ 50(GLY). / O [ O]: 4.96  
     /1/A/ 49(ALA). / N [ N]: 3.33  
     /1/A/ 49(ALA). / CA [ C]: 4.00  
     /1/A/ 49(ALA). / C [ C]: 4.91  
     /1/A/ 50(GLY). / N [ N]: 4.65

/1/D/ 1(FFF). / C6 [ C]: /1/A/ 49(ALA). / CB [ C]: 4.92

/1/A/ 49(ALA). / N [ N]: 4.79

/1/A/ 49(ALA). / CA [ C]: 4.73

/1/D/ 1(FFF). / O6 [ O]: /1/A/ 51(ALA). / O [ O]: 4.26

/1/A/ 52(ALA). / CA [ C]: 4.86

/1/A/ 52(ALA). / C [ C]: 4.30

/1/A/ 53(ALA). / N [ N]: 4.23

/1/A/ 52(ALA). / O [ O]: 4.47

/1/A/ 53(ALA). / CA [ C]: 4.38

/1/A/ 53(ALA). / CB [ C]: 4.49

/1/D/ 1(FFF). / O7 [ O]: /1/A/ 52(ALA). / C [ C]: 4.98

/1/A/ 53(ALA). / N [ N]: 4.29

/1/A/ 53(ALA). / CA [ C]: 4.15

/1/A/ 53(ALA). / CB [ C]: 3.48

/1/D/ 1(FFF). / C9 [ C]: /1/A/ 49(ALA). / CB [ C]: 4.66

/1/A/ 47(ALA). / O [ O]: 4.55

/1/A/ 48(ALA). / CB [ C]: 4.66

/1/A/ 49(ALA). / N [ N]: 4.56

/1/A/ 49(ALA). / CA [ C]: 4.94

/1/D/ 1(FFF). / C10[ C]: /1/A/ 49(ALA). / CB [ C]: 4.32

/1/A/ 47(ALA). / O [ O]: 4.30

/1/A/ 48(ALA). / CA [ C]: 4.62

/1/A/ 48(ALA). / C [ C]: 4.43

/1/A/ 48(ALA). / CB [ C]: 3.59

/1/A/ 49(ALA). / N [ N]: 3.61

/1/A/ 49(ALA). / CA [ C]: 4.18

/1/D/ 1(FFF). / C11[ C]: /1/A/ 49(ALA). / CB [ C]: 4.46

/1/A/ 48(ALA). / C [ C]: 4.84

/1/A/ 48(ALA). / CB [ C]: 4.16

/1/A/ 49(ALA). / N [ N]: 3.74

/1/A/ 49(ALA). / CA [ C]: 4.05

/1/D/ 1(FFF). / C12[ C]: /1/A/ 49(ALA). / CB [ C]: 4.82

/1/A/ 48(ALA). / C [ C]: 4.79

/1/A/ 48(ALA). / CB [ C]: 4.06

/1/A/ 49(ALA). / N [ N]: 3.64

/1/A/ 49(ALA). / CA [ C]: 3.97

/1/D/ 1(FFF). / C24[ C]: /1/A/ 53(ALA). / N [ N]: 4.71

/1/A/ 53(ALA). / CA [ C]: 4.66

/1/A/ 53(ALA). / CB [ C]: 4.33

**Table S7.** HRMS for Compounds **1-10**

| Compound | Observed Mass | Theoretical Mass |
|----------|---------------|------------------|
| 1        | 722.3819      | 722.3832         |
| 2        | ND            | 368.1406         |
| 3        | 313.3097      | 313.3093         |
| 4        | ND            | 626.1811         |
| 5        | 612.3264      | 612.3199         |
| 6        | 460.2056      | 460.2032         |
| 7        | 744.4146      | 743.4079         |
| 8        | 419.2491      | 419.2460         |
| 9        | ND            | 438.2002         |
| 10       | 526.4492      | 526.4458         |

**ND = Parent molecular ion not detected.**

A

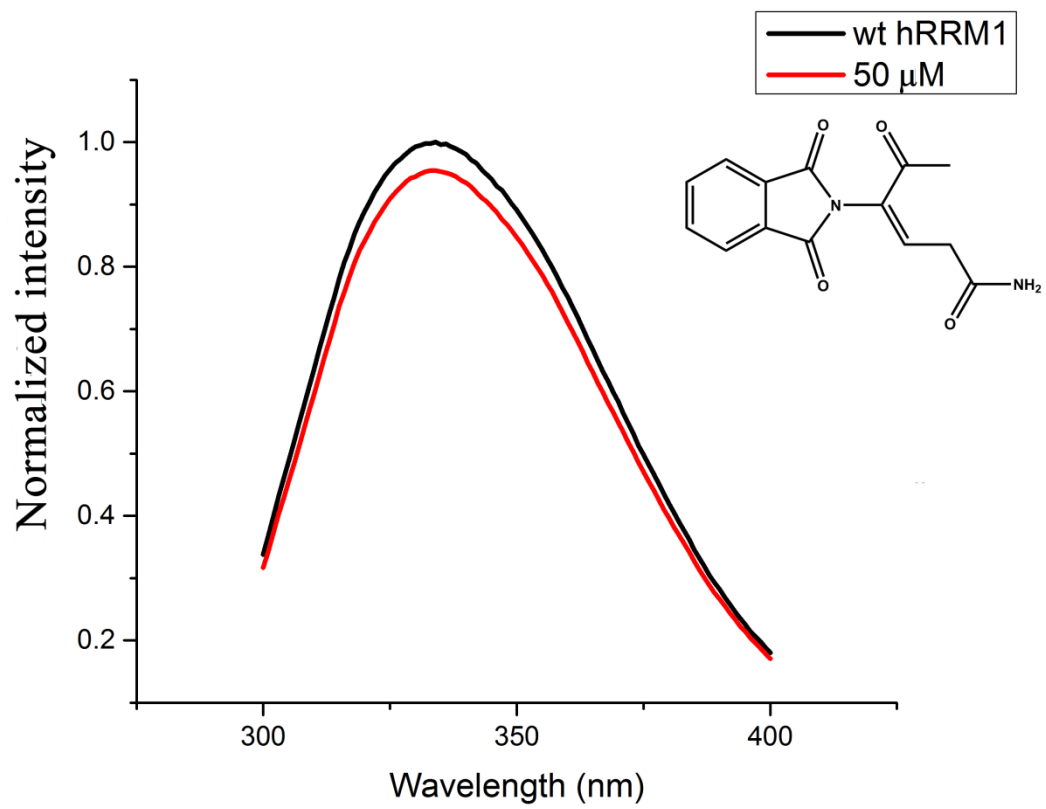

B

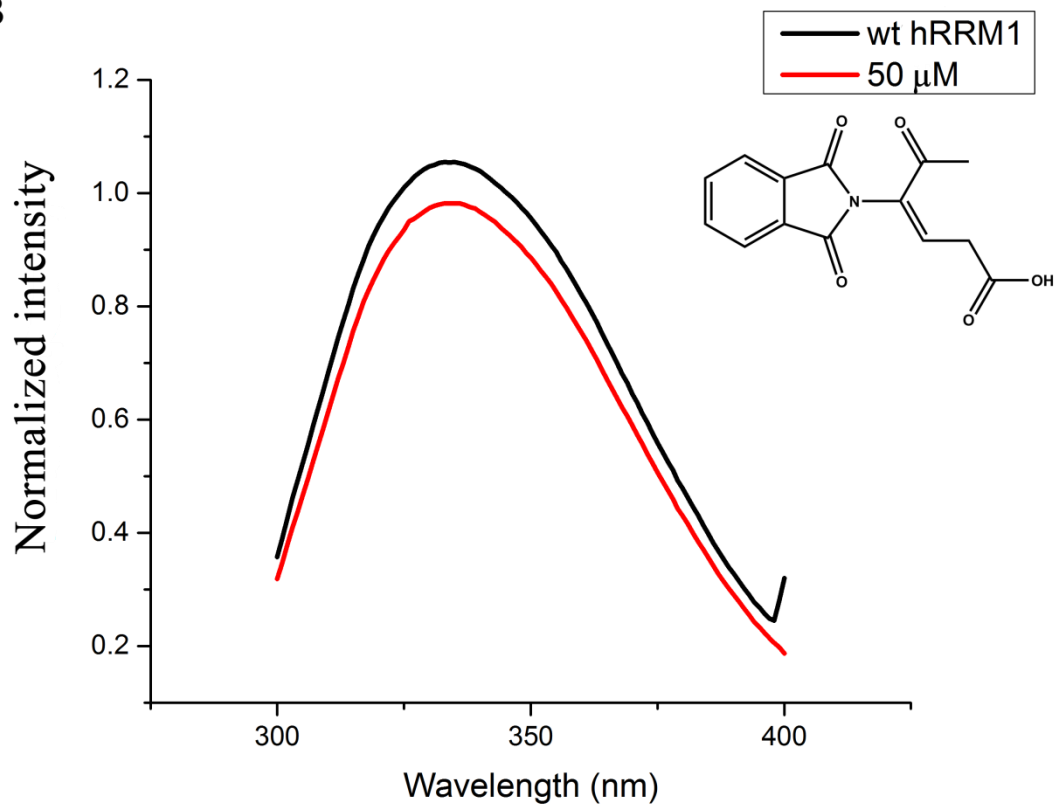

**Fig S1.** Controls for nonspecific and artificial inhibition in fluorescence quenching assays. Two phthalimide compounds from an unrelated library were chosen for their structural similarity to **Compound 4**. A. (E)-4-(1,3-dioxoisindolin-2-yl)-5-oxohex-2-enamide shows 5% quenching at 50  $\mu$ M. B. (E)-4-(1,3-dioxoisindolin-2-yl)-5-oxohex-2-enoic acid shows 7% quenching at 50  $\mu$ M.

**Fig S2.**  $^1\text{H-NMR}$  data for compounds in Table 1.

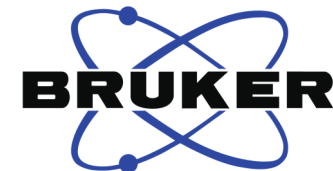

Current Data Parameters  
NAME May11-2015-sample1  
EXPNO 1

F2 - Acquisition Parameters  
Date\_ 20150511  
Time 11.52  
INSTRUM spect  
PROBHD 5 mm CPPBBO BB  
PULPROG zg30  
TD 65536  
SOLVENT DMSO  
NS 128  
DS 2  
SWH 10000.000 Hz  
FIDRES 0.152588 Hz  
AQ 3.2767999 sec  
RG 30.44  
DW 50.000 usec  
DE 10.00 usec  
TE 298.0 K  
D1 1.00000000 sec  
TD0 1

===== CHANNEL f1 =====  
SFO1 500.2430892 MHz

P1 11.05 usec  
PLW1 15.10000038 W

F2 - Processing parameters  
SI 65536  
SF 500.2400000 MHz  
WDW EM  
SSB 0  
LB 0.30 Hz  
GB 0  
PC 1.00

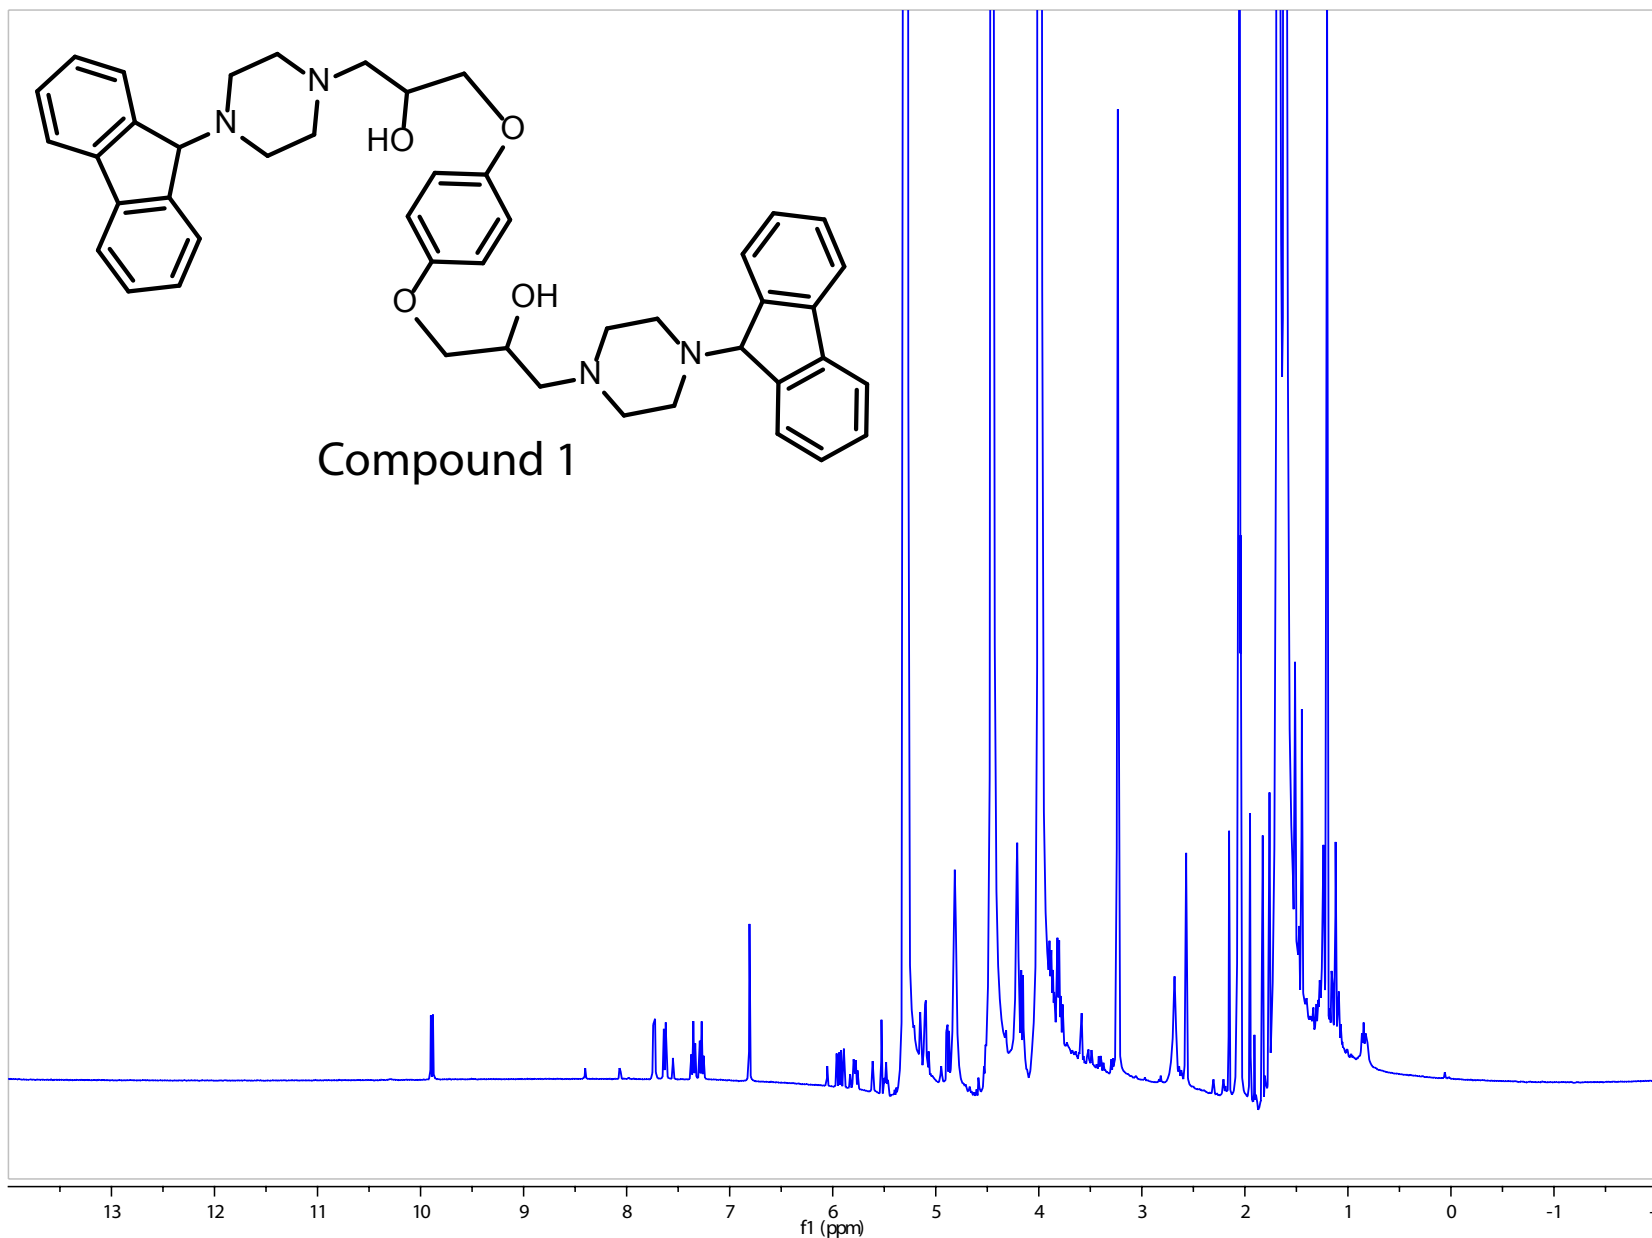



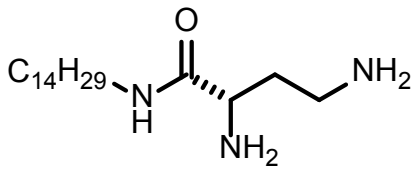

Compound 3

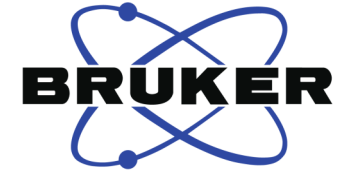

Current Data Parameters  
 NAME May11-2015-sample1  
 EXPNO 1  
 PROCNO 1

F2 - Acquisition Parameters  
 Date\_ 20150511  
 Time 11.52  
 INSTRUM spect  
 PROBHD 5 mm CPPBBO BB  
 PULPROG zg30  
 TD 65536  
 SOLVENT Acetone  
 NS 128  
 DS 2  
 SWH 10000.000 Hz  
 FIDRES 0.152588 Hz  
 AQ 3.2767999 sec  
 RG 30.44  
 DW 50.000 usec  
 DE 10.00 usec  
 TE 298.0 K  
 D1 1.00000000 sec  
 TD0 1

===== CHANNEL f1 =====  
 SFO1 500.2430892 MHz  
 NUC1 1H  
 P1 11.05 usec  
 PLW1 15.10000038 W

F2 - Processing parameters  
 SI 65536  
 SF 500.2400000 MHz  
 WDW EM  
 SSB 0  
 LB 0.30 Hz  
 GB 0  
 PC 1.00

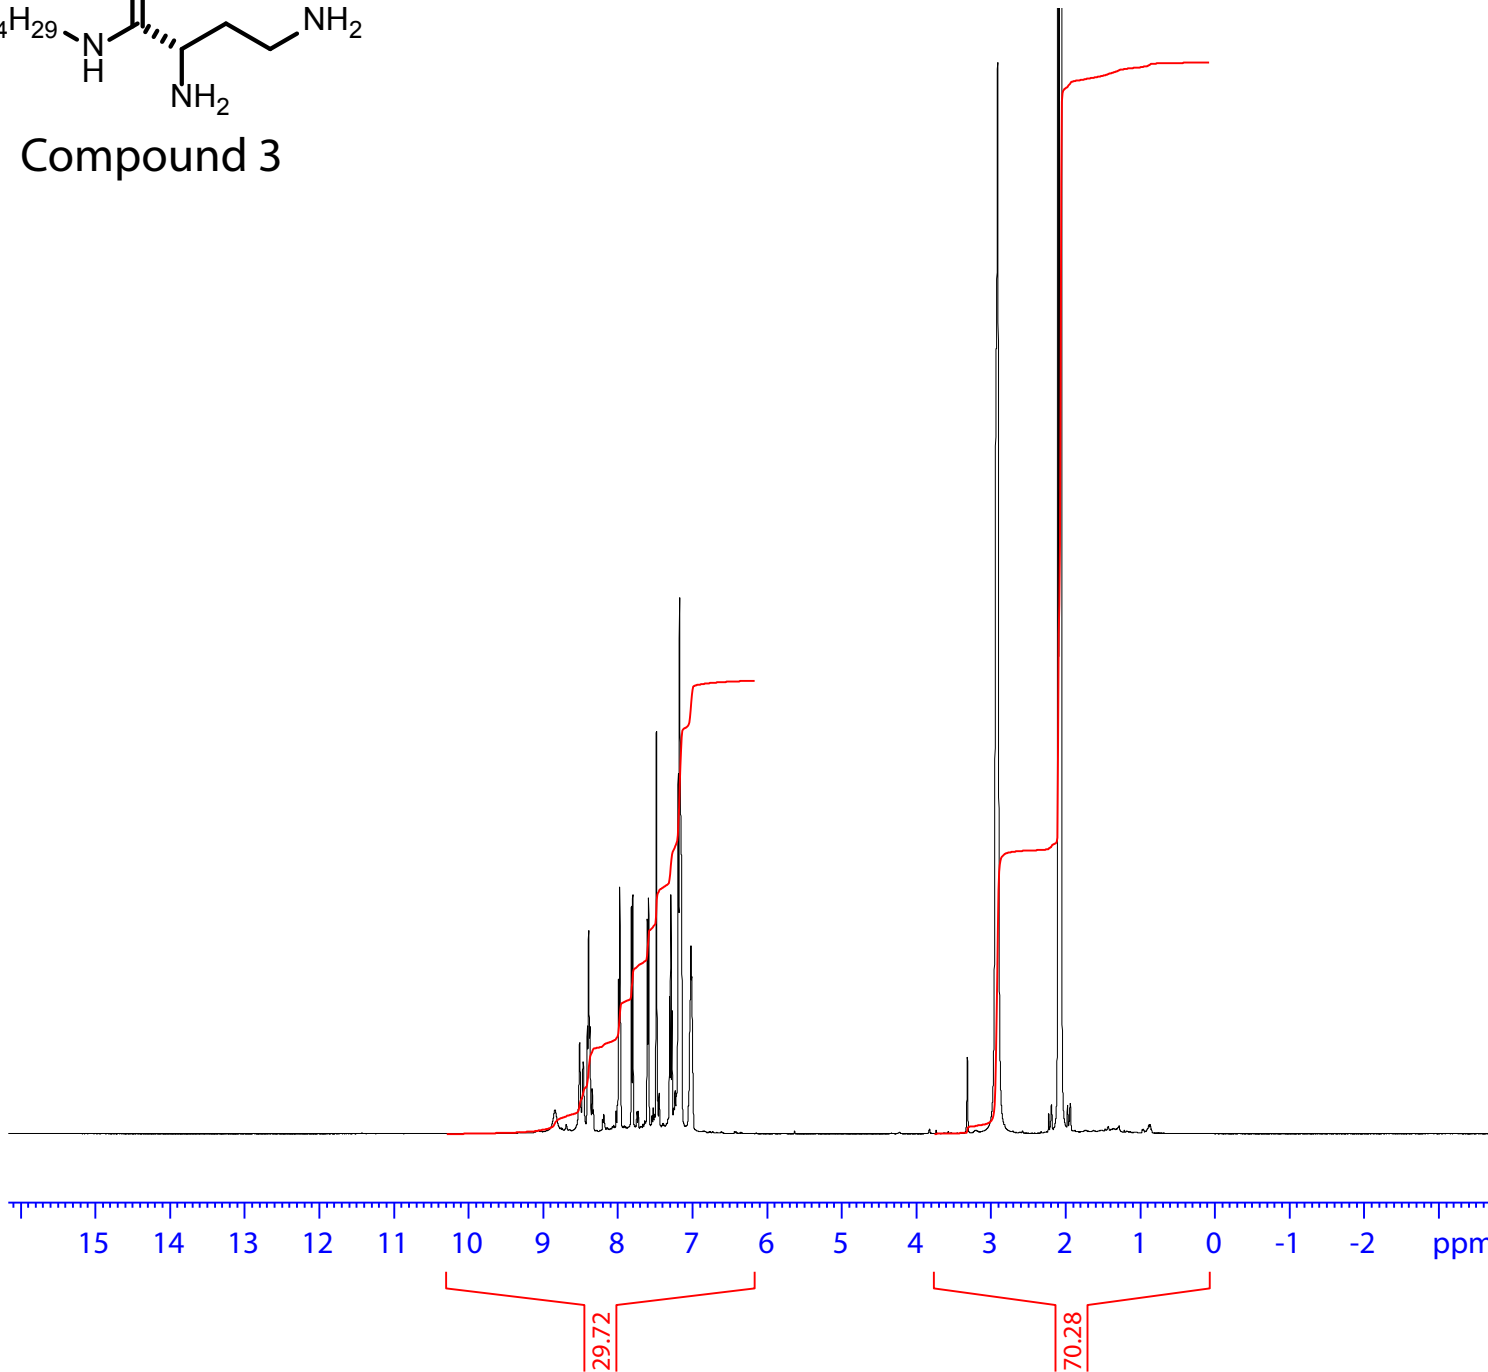

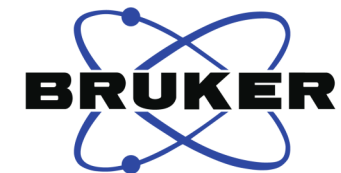

Current Data Parameters  
NAME May11-2015-sample1  
EXPNO 1  
PROCNO 1

F2 - Acquisition Parameters  
Date\_ 20150511  
Time 11.52  
INSTRUM spect  
PROBHD 5 mm CPPBBO BB  
PULPROG zg30  
TD 65536  
SOLVENT DMSO  
NS 128  
DS 2  
SWH 10000.000 Hz  
FIDRES 0.152588 Hz  
AQ 3.2767999 sec  
RG 30.44  
DW 50.000 usec  
DE 10.00 usec  
TE 298.0 K  
D1 1.00000000 sec  
TD0 1

===== CHANNEL f1 =====  
SFO1 500.2430892 MHz  
NUC1 1H  
P1 11.05 usec  
PLW1 15.10000038 W

F2 - Processing parameters  
SI 65536  
SF 500.2400000 MHz  
WDW EM  
SSB 0  
LB 0.30 Hz  
GB 0  
PC 1.00

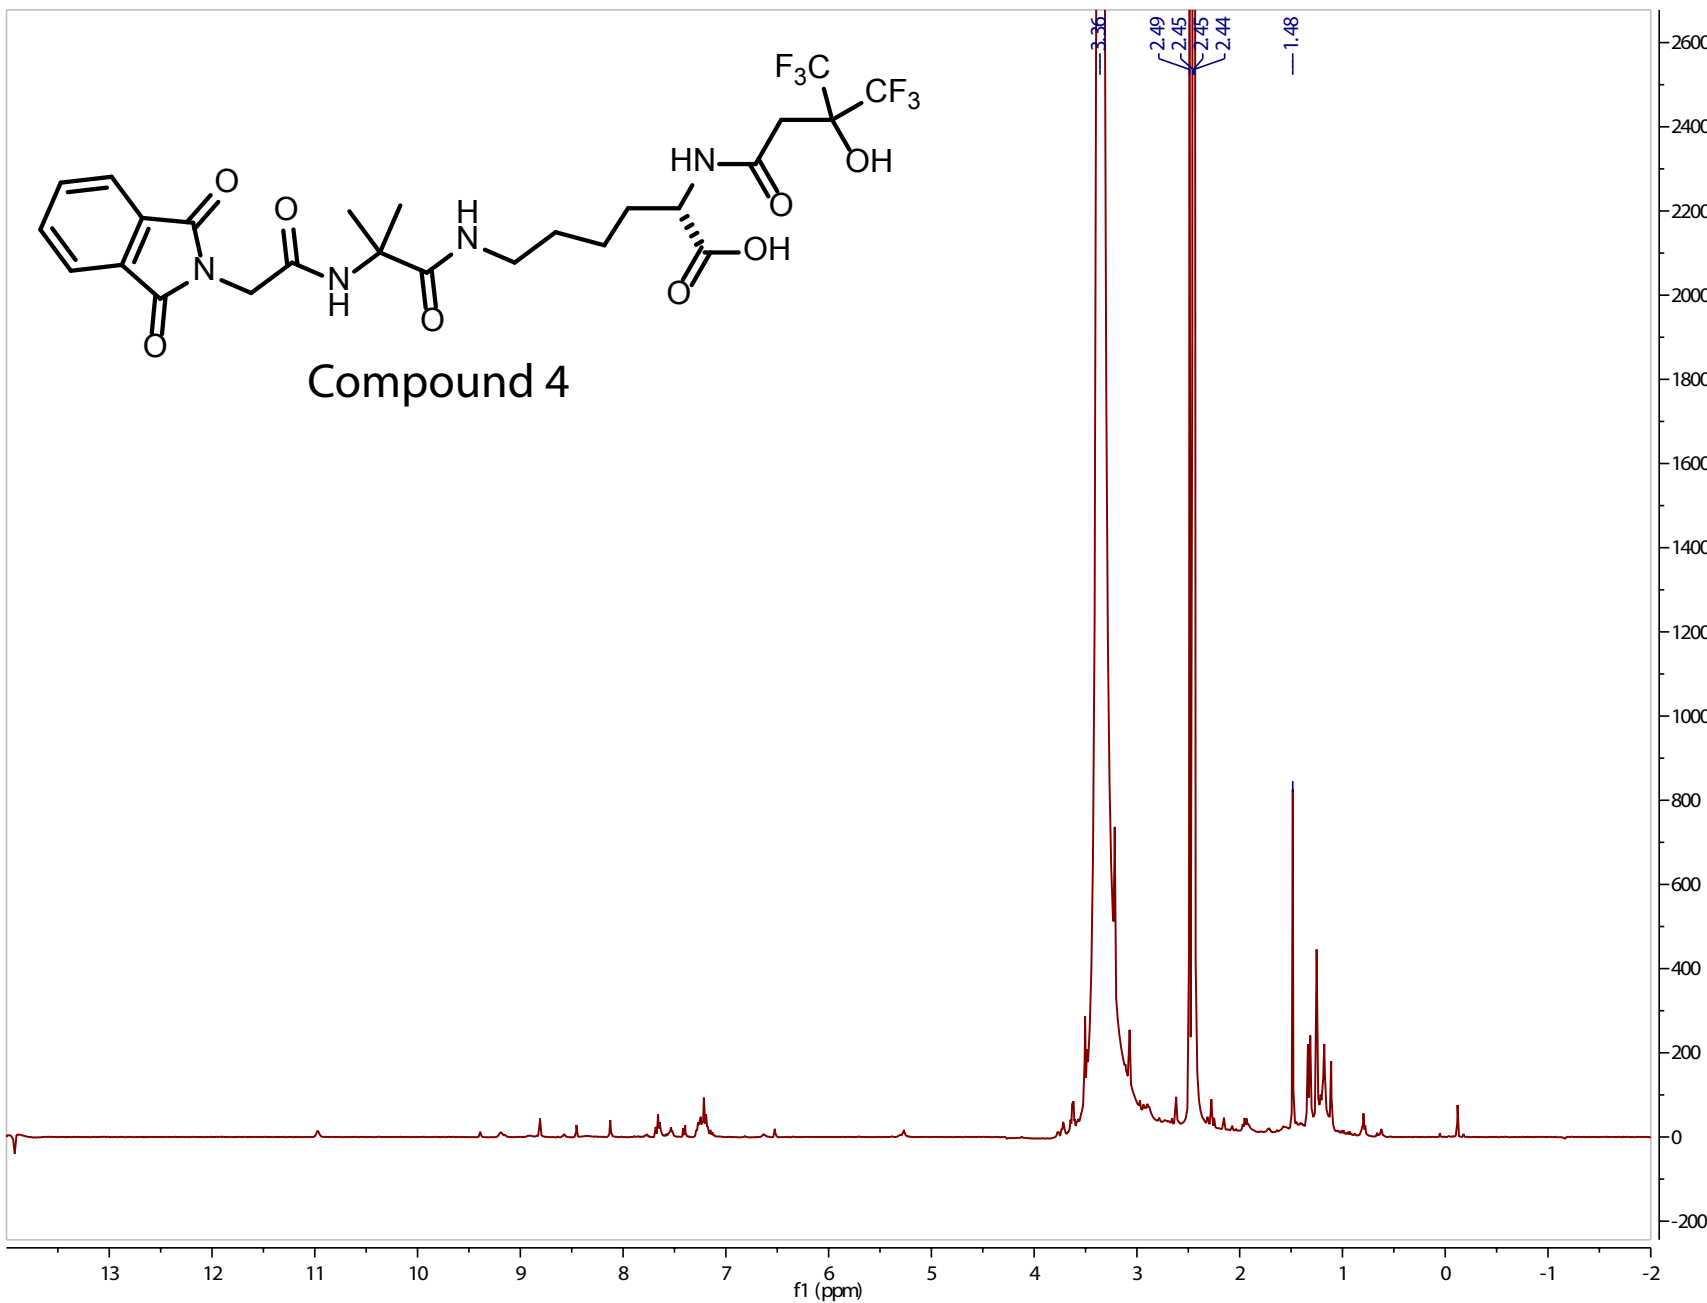

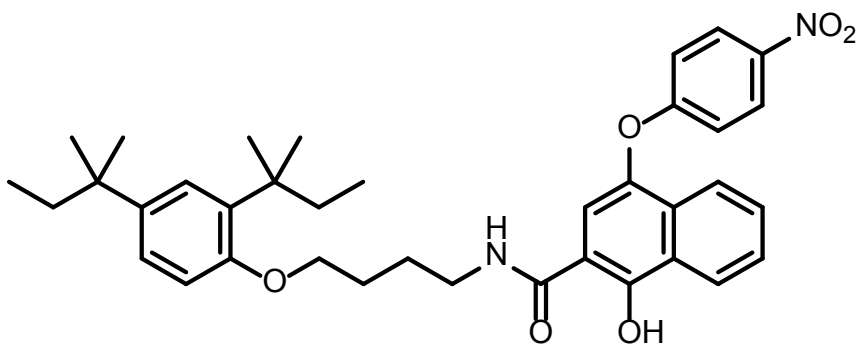

Compound 5

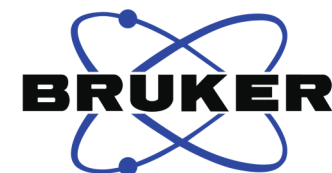

Current Data Parameters  
 NAME May07-2015-compound7  
 EXPNO 1  
 PROCNO 1

F2 - Acquisition Parameters  
 Date\_ 20150507  
 Time 16.51  
 INSTRUM spect  
 PROBHD 5 mm CPPBBO BB  
 PULPROG zg30  
 TD 65536  
 SOLVENT Acetone  
 NS 256  
 DS 2  
 SWH 10000.000 Hz  
 FIDRES 0.152588 Hz  
 AQ 3.2767999 sec  
 RG 30.44  
 DW 50.000 usec  
 DE 10.00 usec  
 TE 298.0 K  
 D1 1.00000000 sec  
 TD0 1

===== CHANNEL f1 =====  
 SFO1 500.2430892 MHz  
 NUC1 1H  
 P1 11.05 usec  
 PLW1 15.10000038 W

F2 - Processing parameters  
 SI 65536  
 SF 500.2400000 MHz  
 WDW EM  
 SSB 0  
 LB 0.30 Hz  
 GB 0  
 PC 1.00

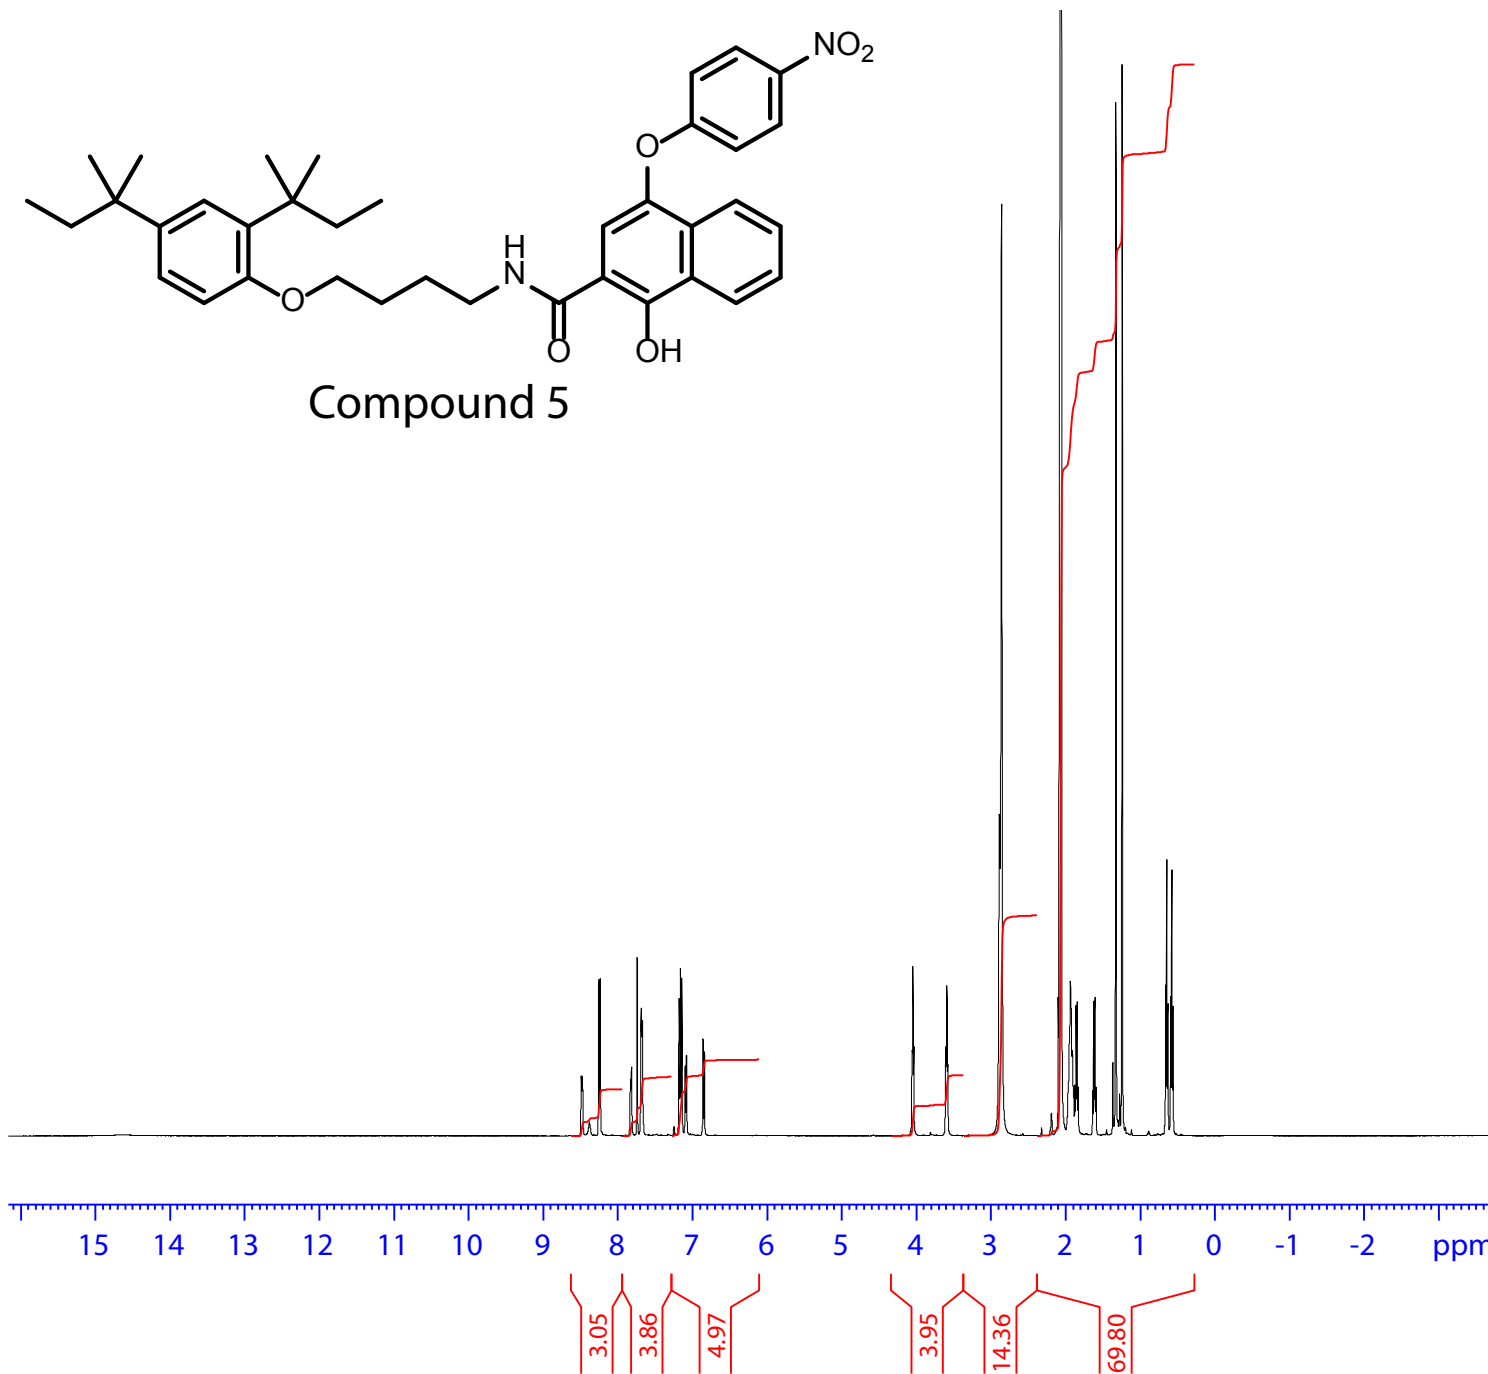

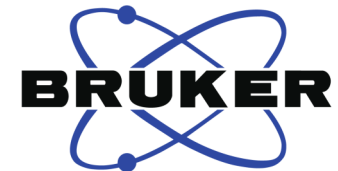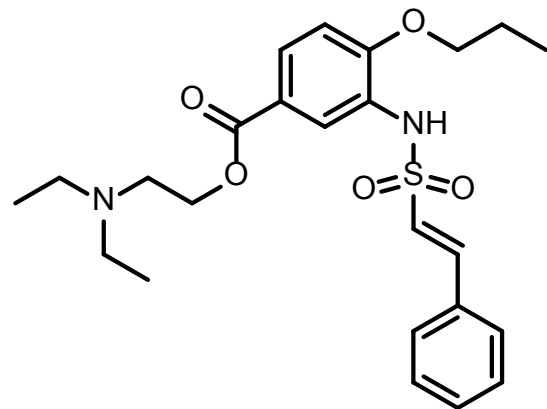

Compound 6

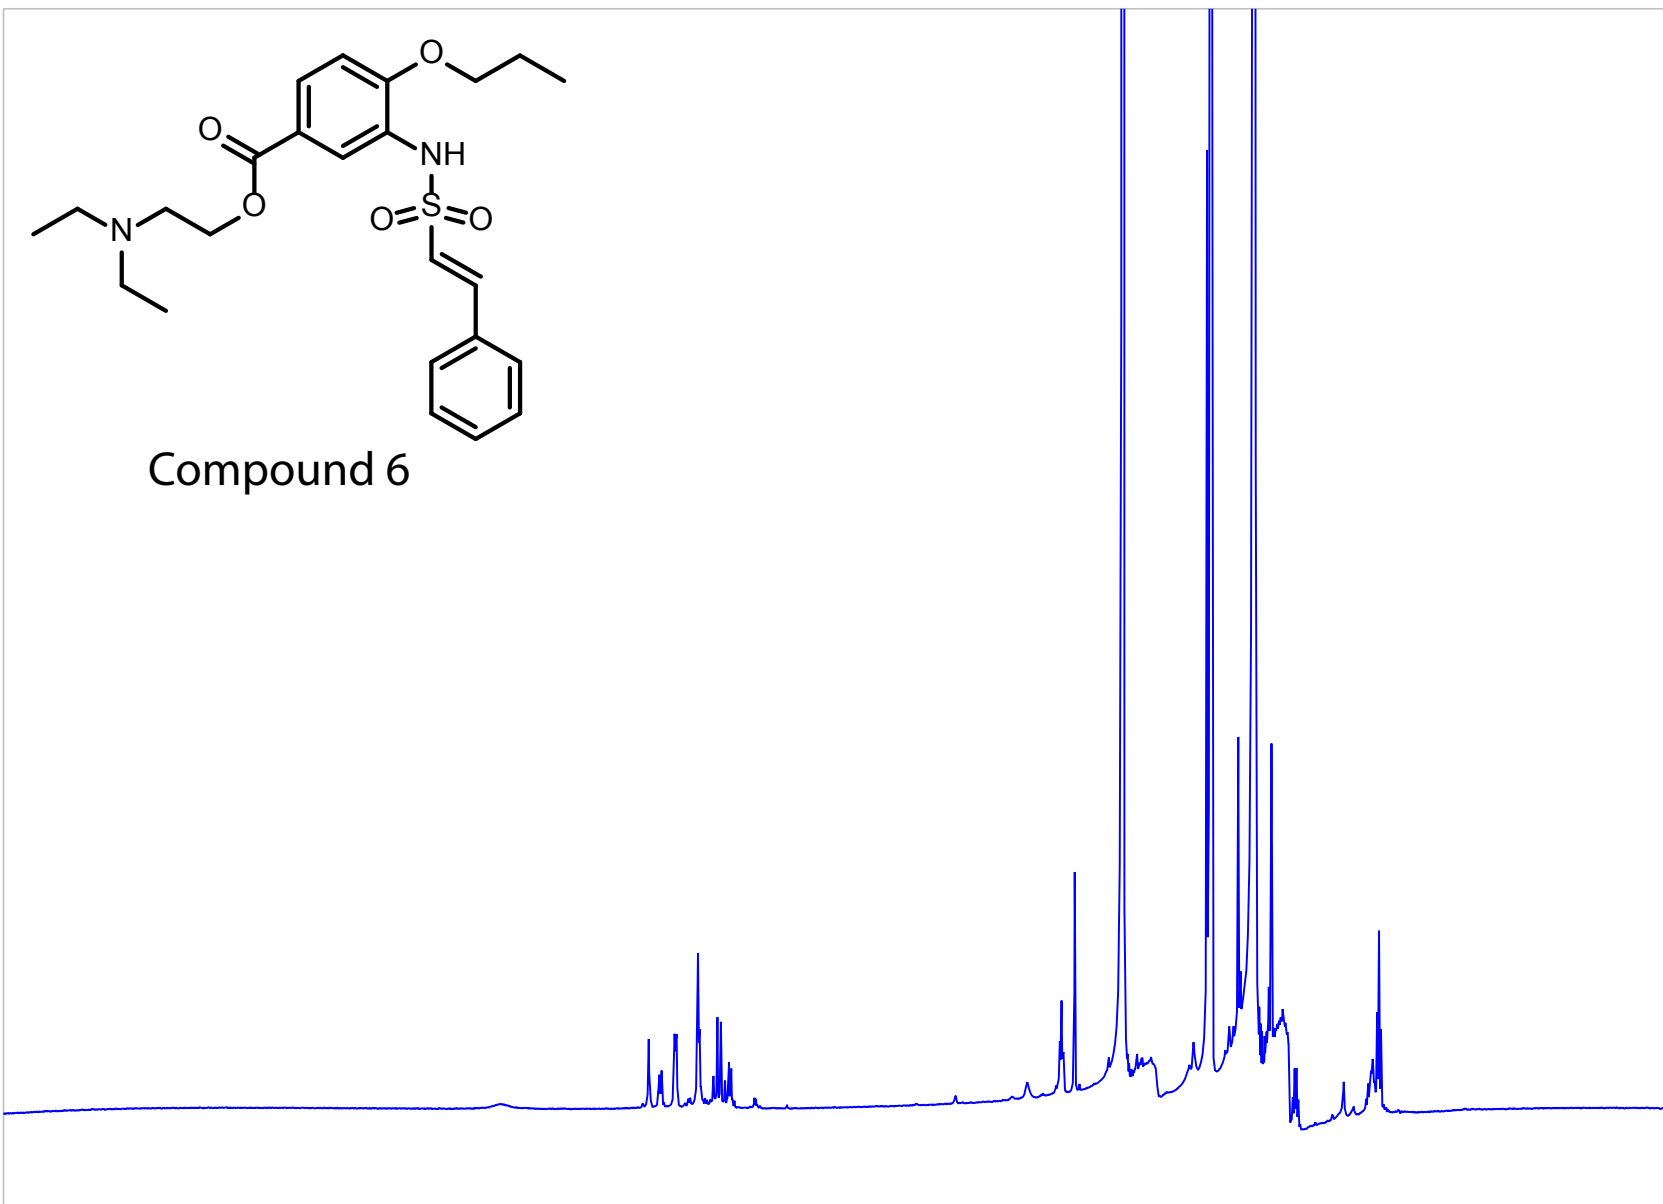

Current Data Parameters  
NAME May11-2015-sample1  
EXPNO 1  
PROCNO 1

F2 - Acquisition Parameters  
Date\_ 20150511  
Time 11.52  
INSTRUM spect  
PROBHD 5 mm CPPBBO BB  
PULPROG zg30  
TD 65536  
SOLVENT DMSO  
NS 128  
DS 2  
SWH 10000.000 Hz  
FIDRES 0.152588 Hz  
AQ 3.2767999 sec  
RG 30.44  
DW 50.000 usec  
DE 10.00 usec  
TE 298.0 K  
D1 1.0000000 sec  
TD0 1

===== CHANNEL f1 =====  
SFO1 500.2430892 MHz  
NUC1 1H  
P1 11.05 usec  
PLW1 15.10000038 W

F2 - Processing parameters  
SI 65536  
SF 500.2400000 MHz  
WDW EM  
SSB 0  
LB 0.30 Hz  
GB 0  
PC 1.00

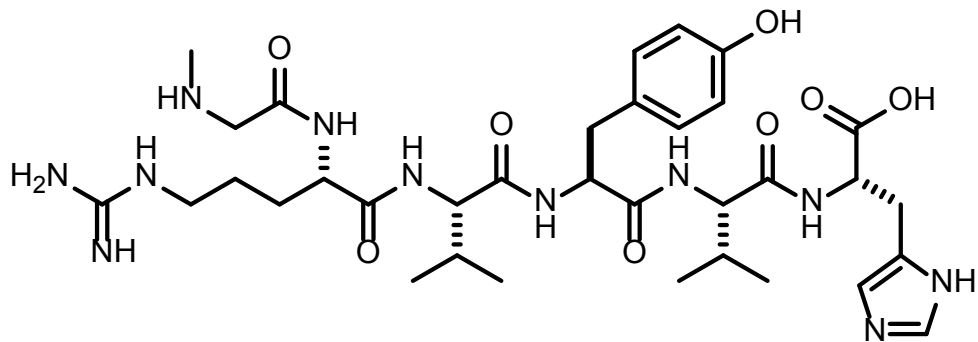

Compound 7

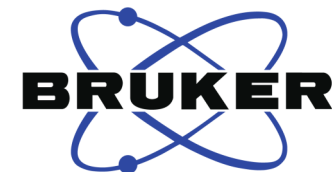

Current Data Parameters  
 NAME May11-2015-sample4  
 EXPNO 1  
 PROCNO 1

F2 - Acquisition Parameters  
 Date\_ 20150511  
 Time 12.29  
 INSTRUM spect  
 PROBHD 5 mm CPPBBO BB  
 PULPROG zg30  
 TD 65536  
 SOLVENT DMSO  
 NS 128  
 DS 2  
 SWH 10000.000 Hz  
 FIDRES 0.152588 Hz  
 AQ 3.2767999 sec  
 RG 30.44  
 DW 50.000 usec  
 DE 10.00 usec  
 TE 298.0 K  
 D1 1.00000000 sec  
 TD0 1

===== CHANNEL f1 =====  
 SFO1 500.2430892 MHz  
 NUC1 1H  
 P1 11.05 usec  
 PLW1 15.10000038 W

F2 - Processing parameters  
 SI 65536  
 SF 500.2400267 MHz  
 WDW EM  
 SSB 0  
 LB 0.30 Hz  
 GB 0  
 PC 1.00

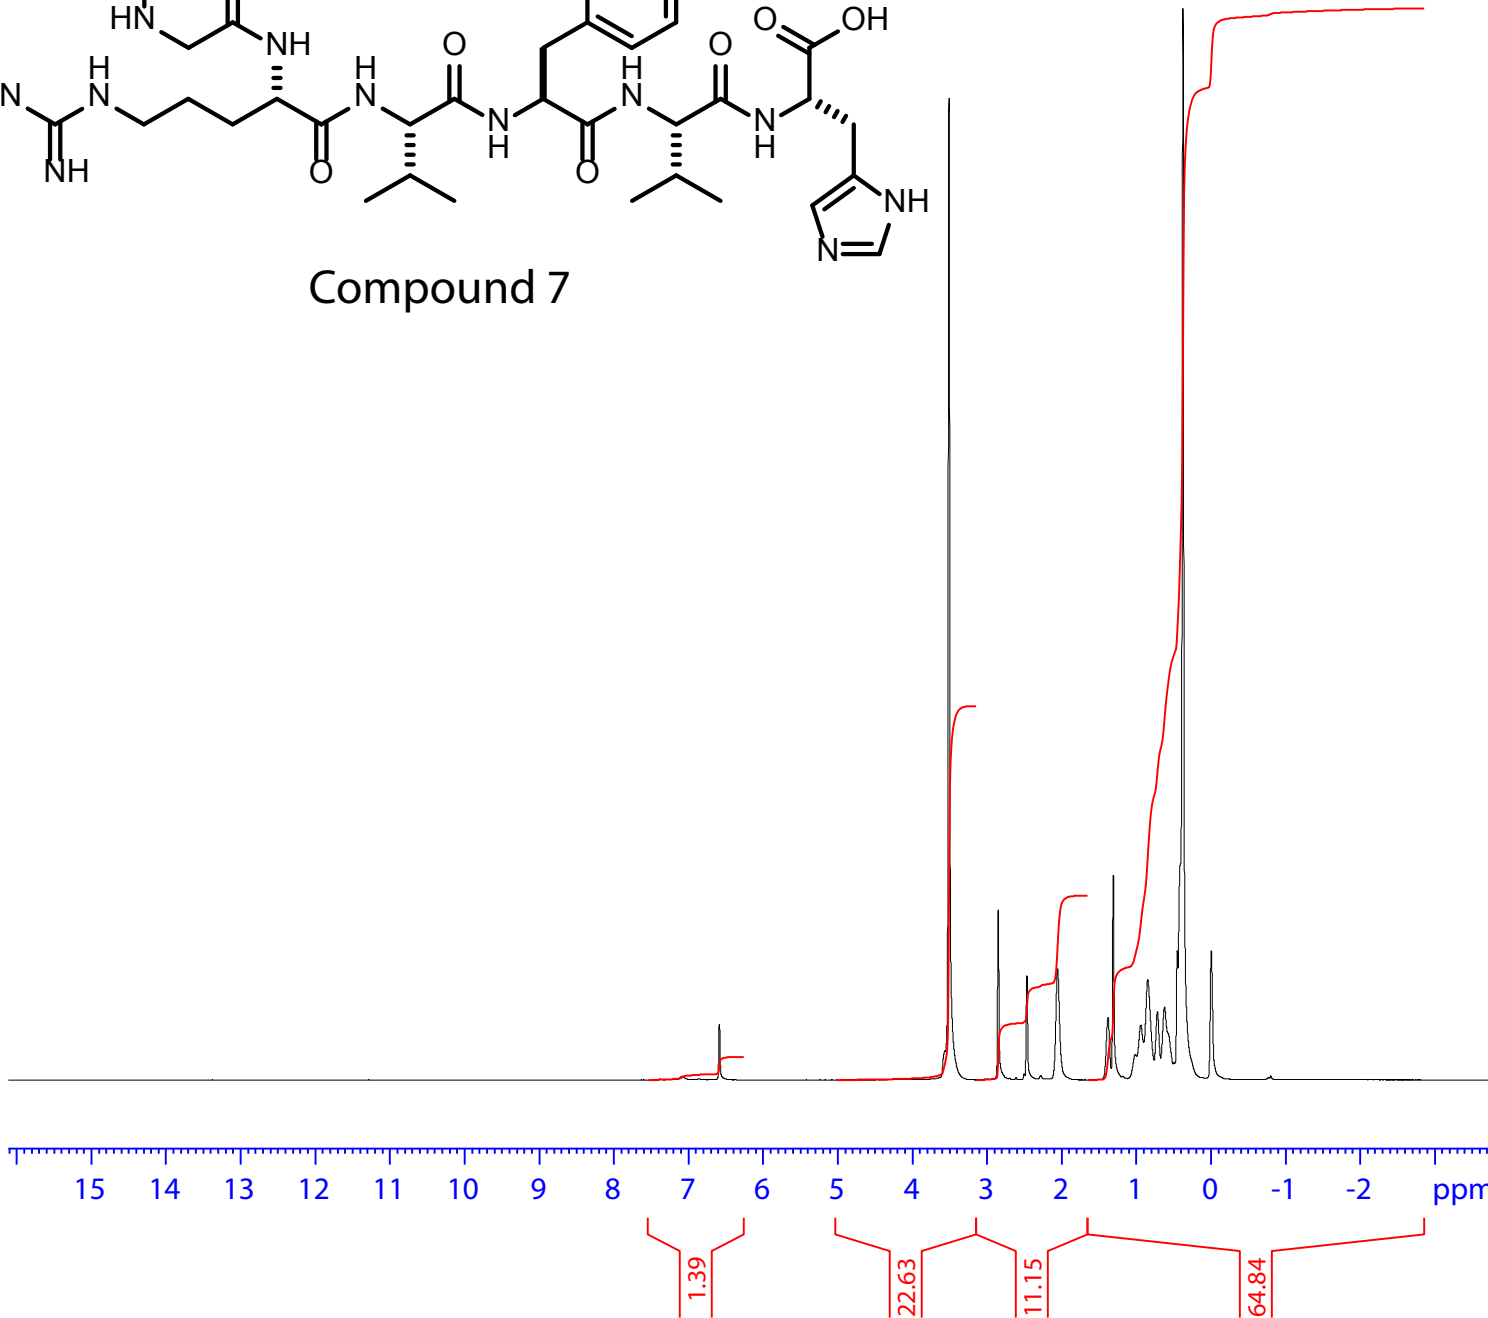

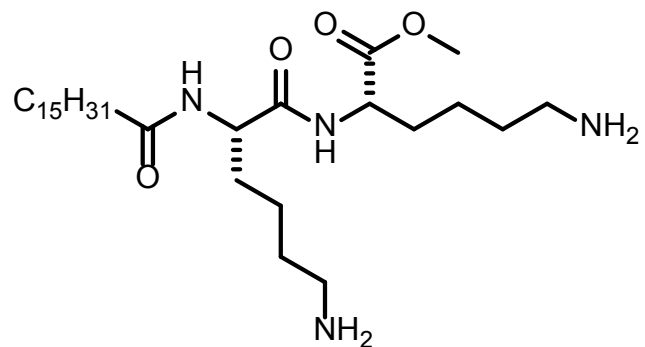

Compound 10

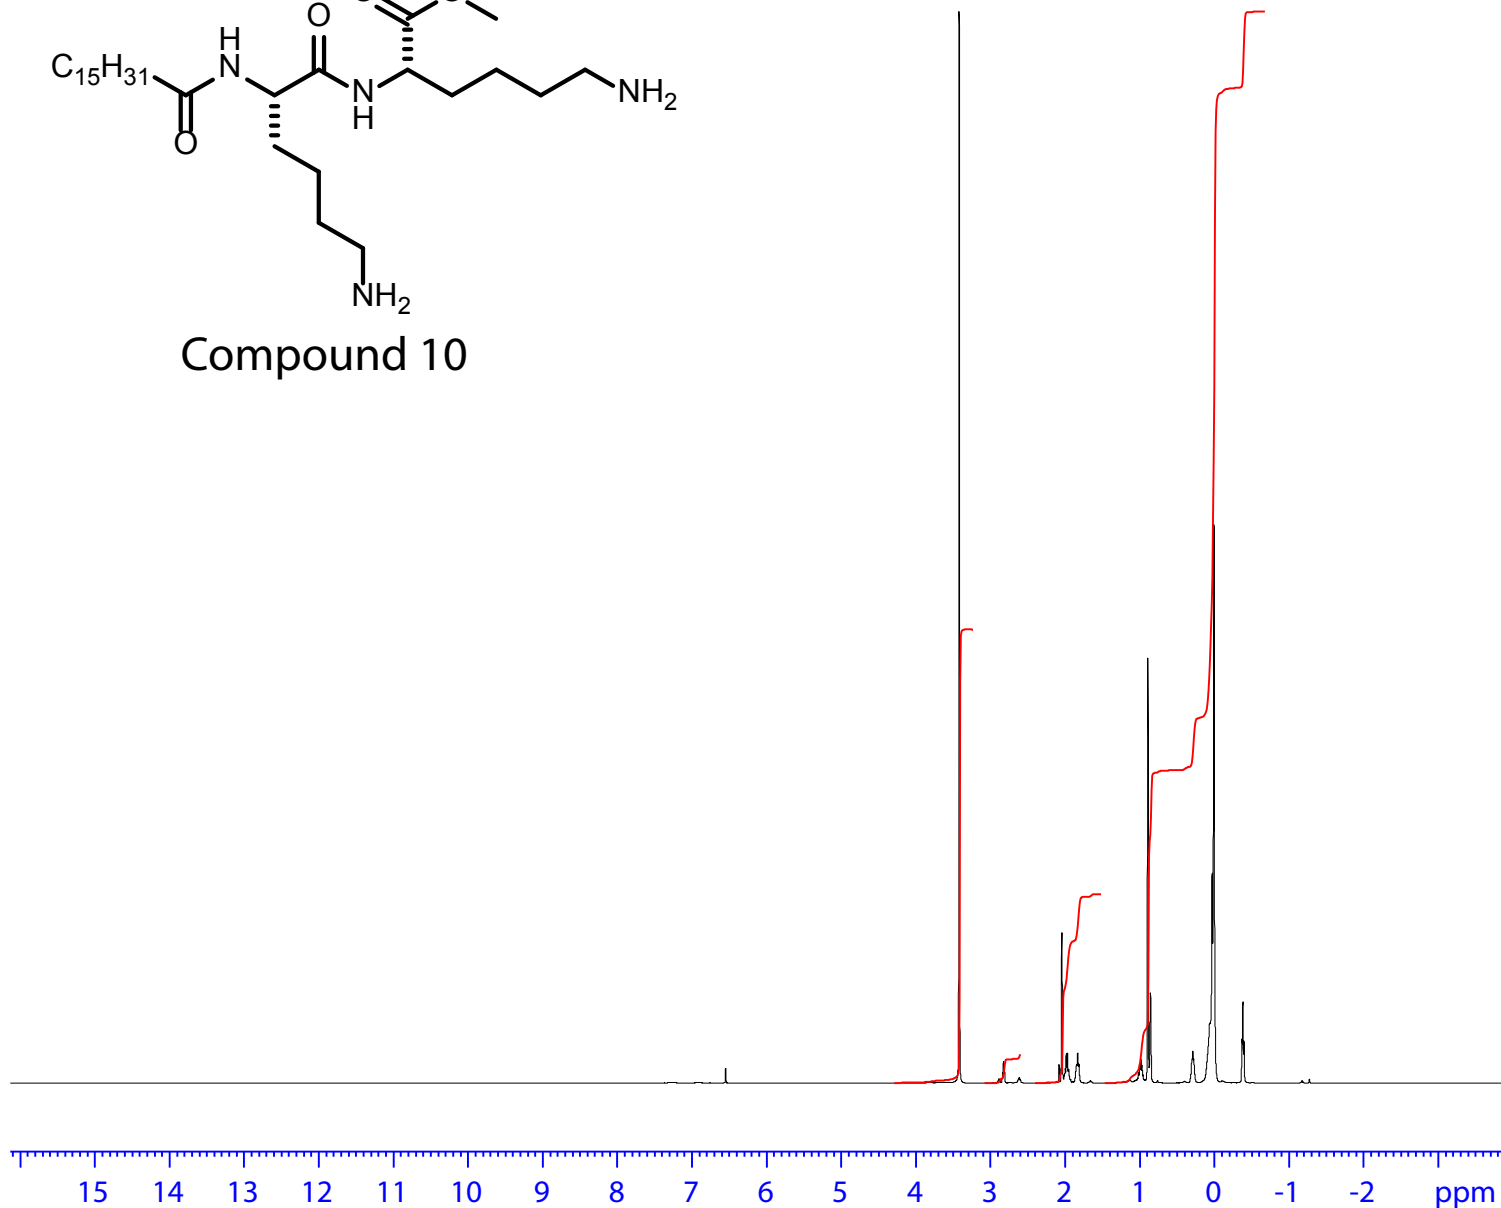

Current Data Parameters  
 NAME May11-2015-sample-0  
 EXPNO 1  
 PROCNO 1

F2 - Acquisition Parameters  
 Date\_ 20150511  
 Time 17.34  
 INSTRUM spect  
 PROBHD 5 mm CPPBBO BB  
 PULPROG zg30  
 TD 65536  
 SOLVENT Acetone  
 NS 128  
 DS 2  
 SWH 10000.000 Hz  
 FIDRES 0.152588 Hz  
 AQ 3.2767999 sec  
 RG 30.44  
 DW 50.000 usec  
 DE 10.00 usec  
 TE 298.0 K  
 D1 1.0000000 sec  
 TD0 1

===== CHANNEL f1 =====  
 SFO1 500.2430892 MHz  
 NUC1 1H  
 P1 11.05 usec  
 PLW1 15.10000038 W

F2 - Processing parameters  
 SI 65536  
 SF 500.2400165 MHz  
 WDW EM  
 SSB 0  
 LB 0.30 Hz  
 GB 0  
 PC 1.00

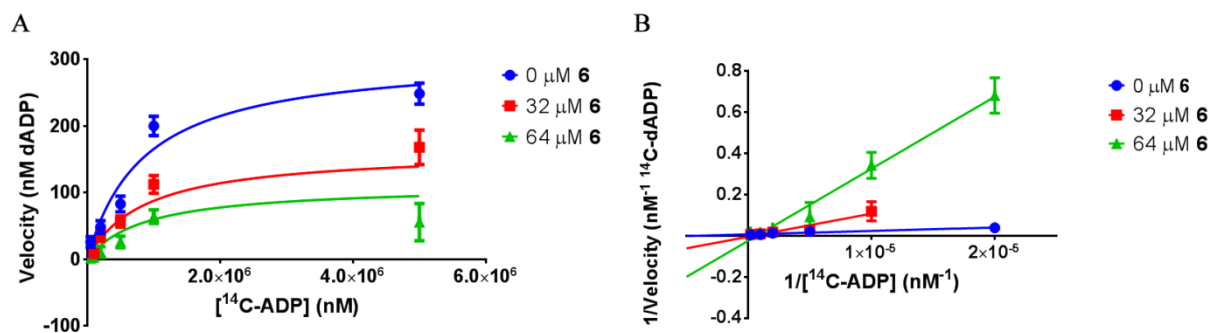

**Fig S3. Compound 4** is a noncompetitive inhibitor of hRRM1. **A.** A plot of velocity versus  $[^{14}\text{C-ADP}]$  shows that in the presence of 32 and 64  $\mu\text{M}$  **Compound 4**, velocity does not increase with increasing substrate concentrations after 1 mM, supporting a noncompetitive mechanism. **B.** Double-reciprocal plot for **Compound 4** at 0, 32, and 64  $\mu\text{M}$ .  $V_{\text{max}}$  changes under all conditions while  $K_m$  remains similar for all concentrations of **Compound 4**. An alpha value of 1.047 confirmed that **Compound 4** follows a noncompetitive mechanism.

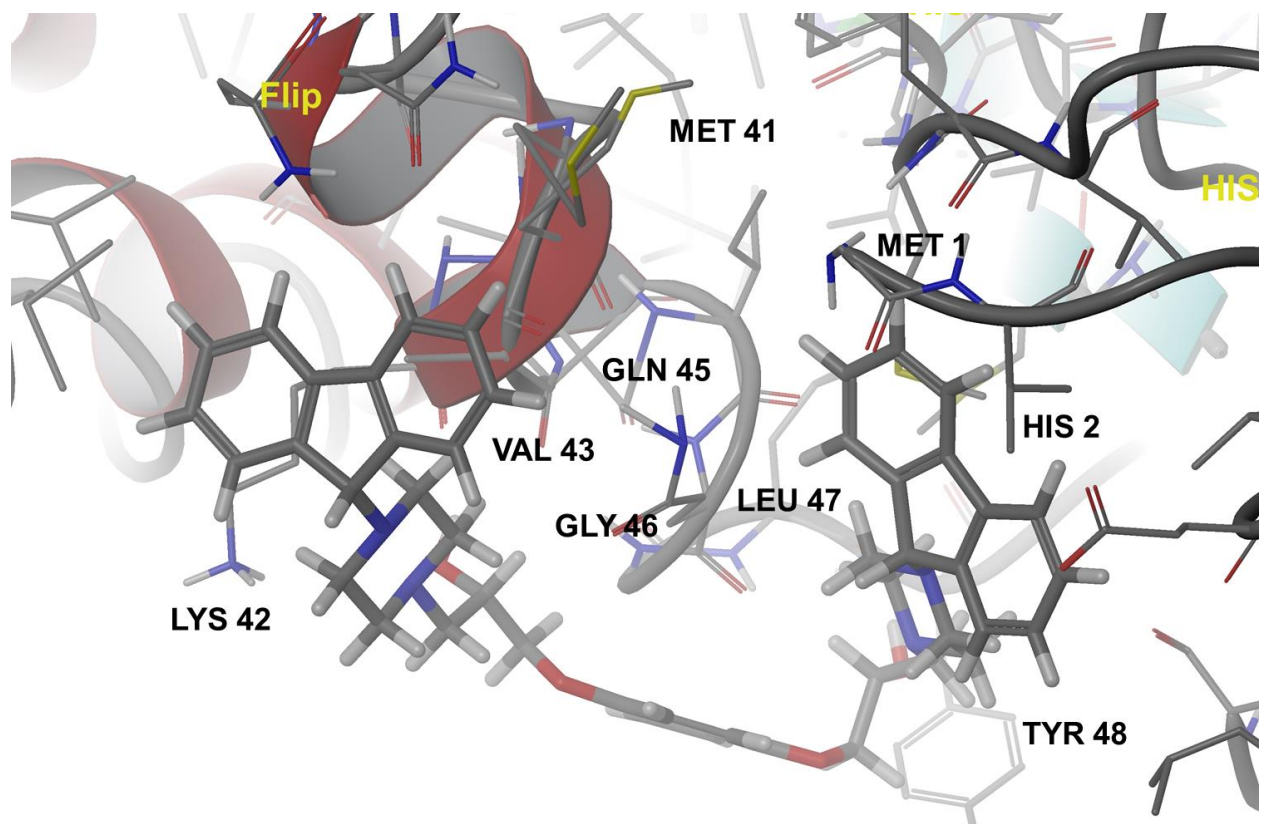

Docking pose Compound 1



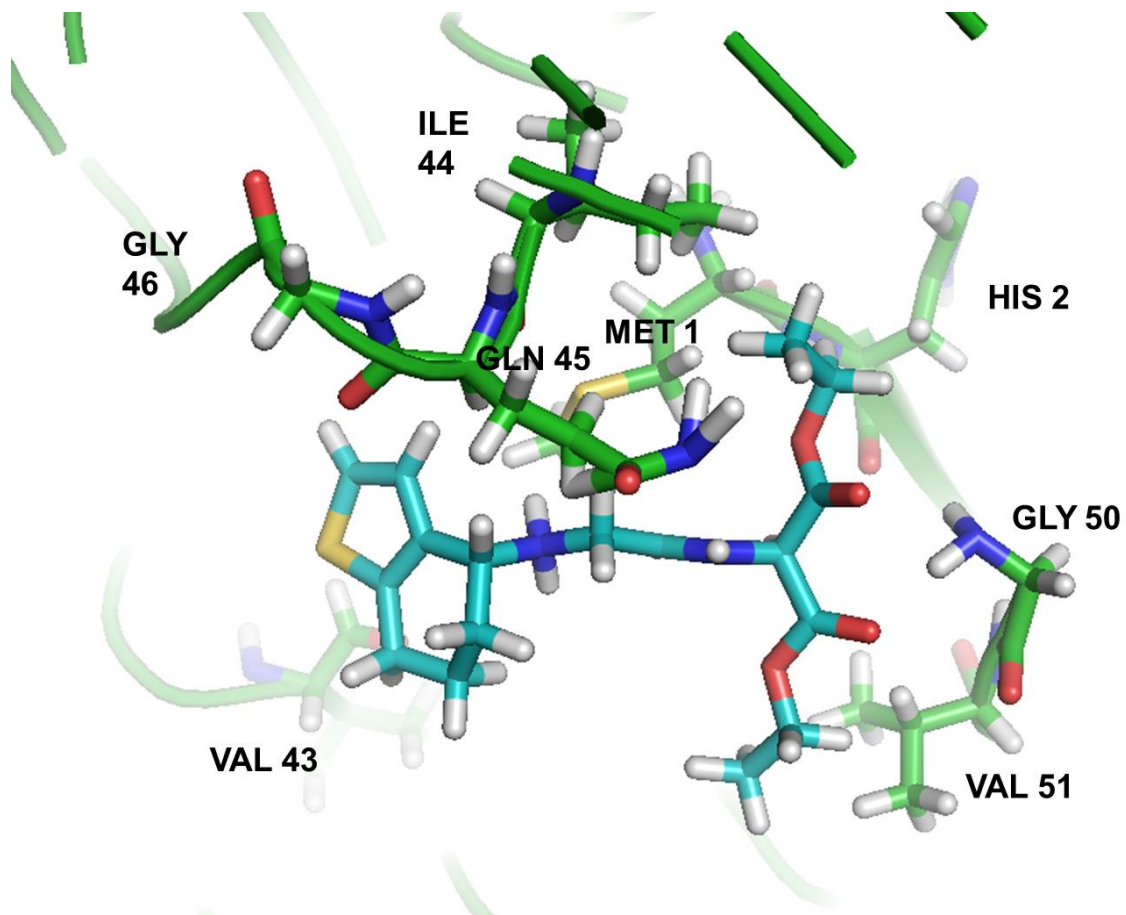

Docking pose Compound 2

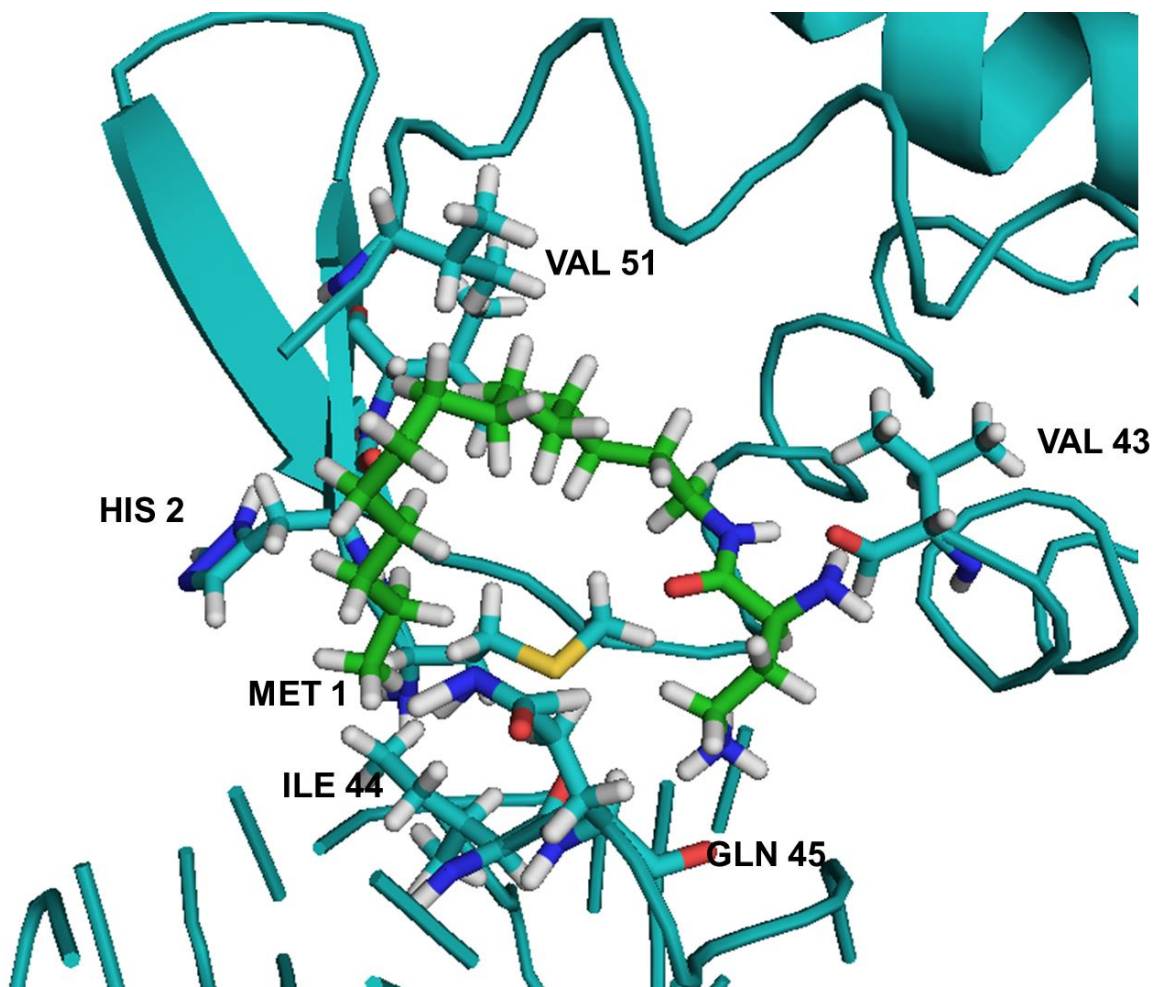

Docking pose Compound 3

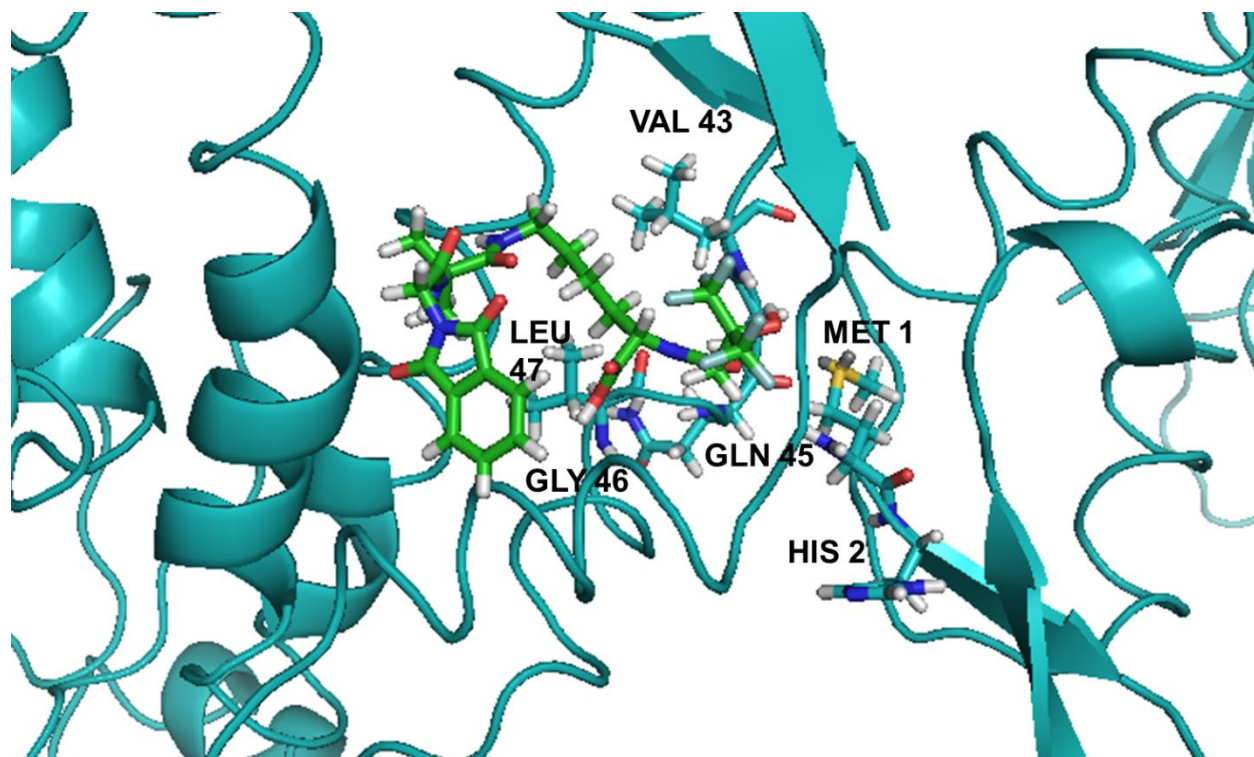

Docking pose for Compound 4

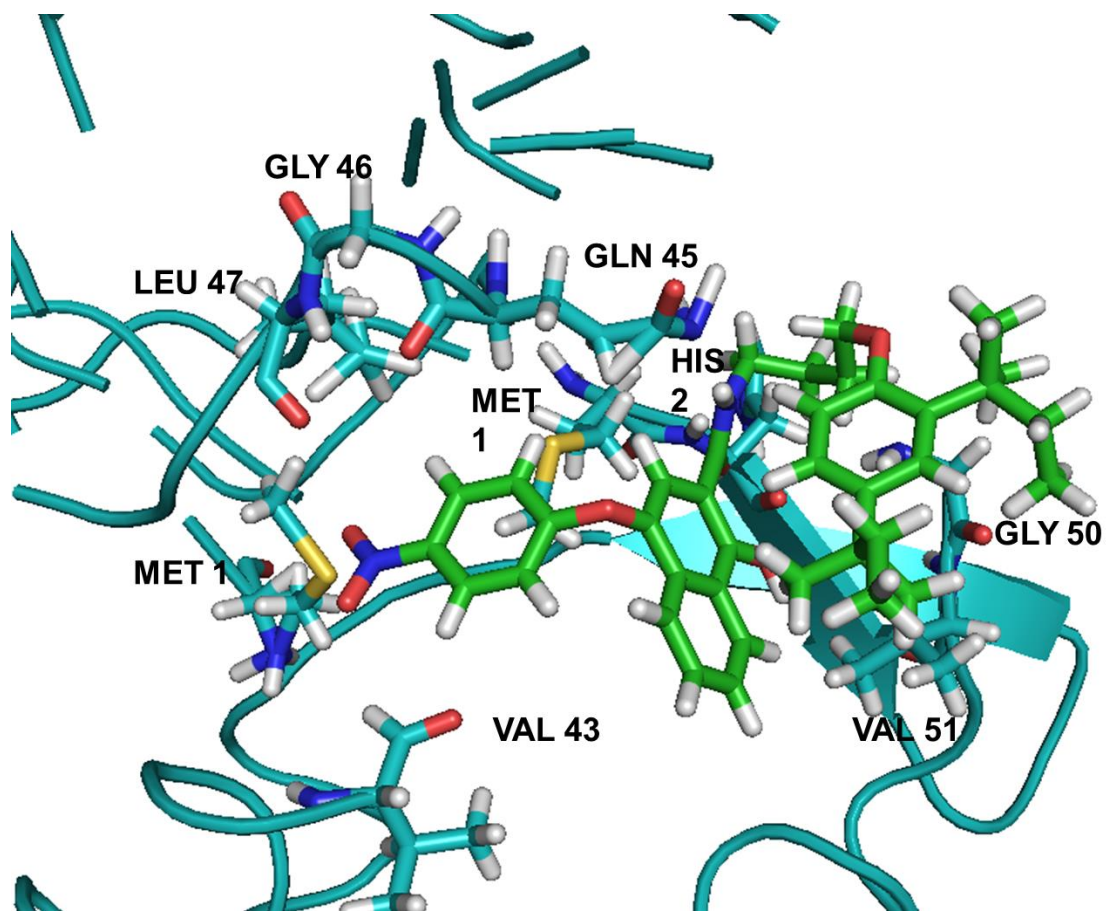

Docking pose for Compound 5

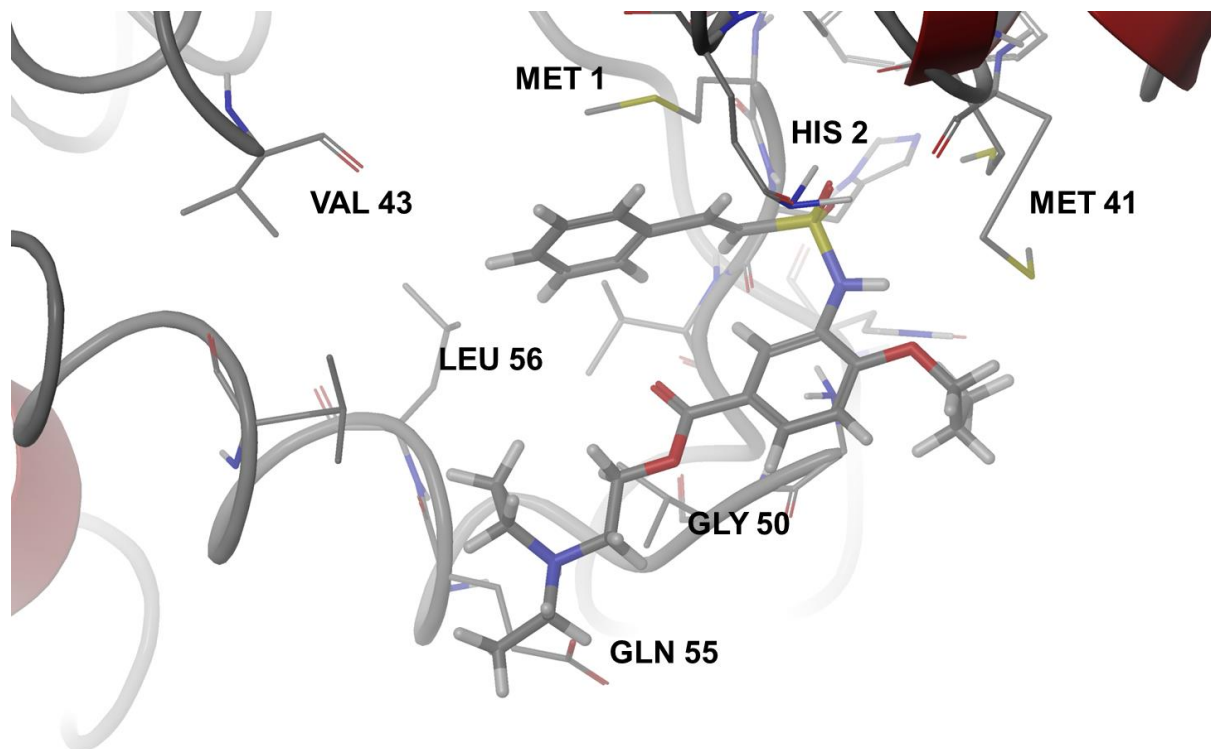

Docking pose for Compound 6

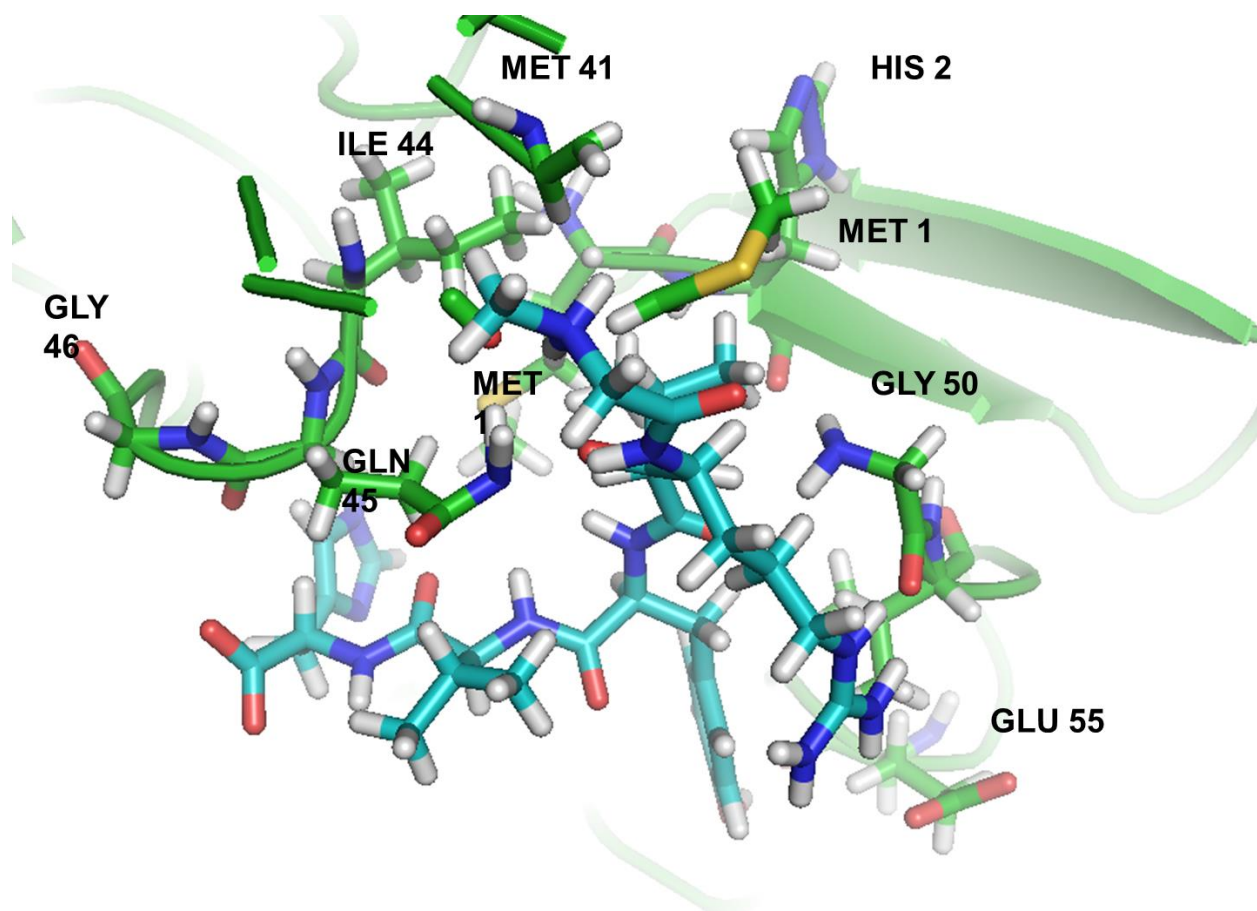

Docking pose for Compound 7

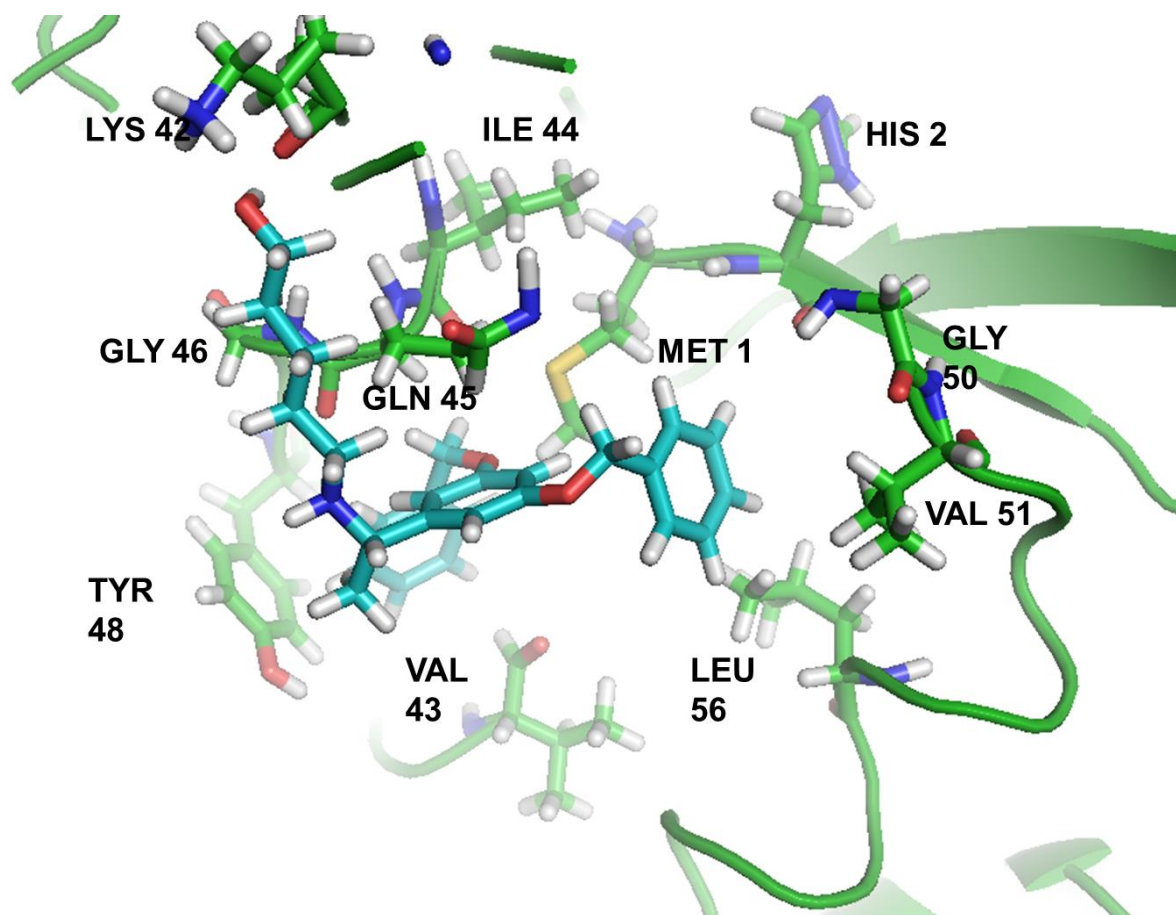

Docking pose for Compound 8

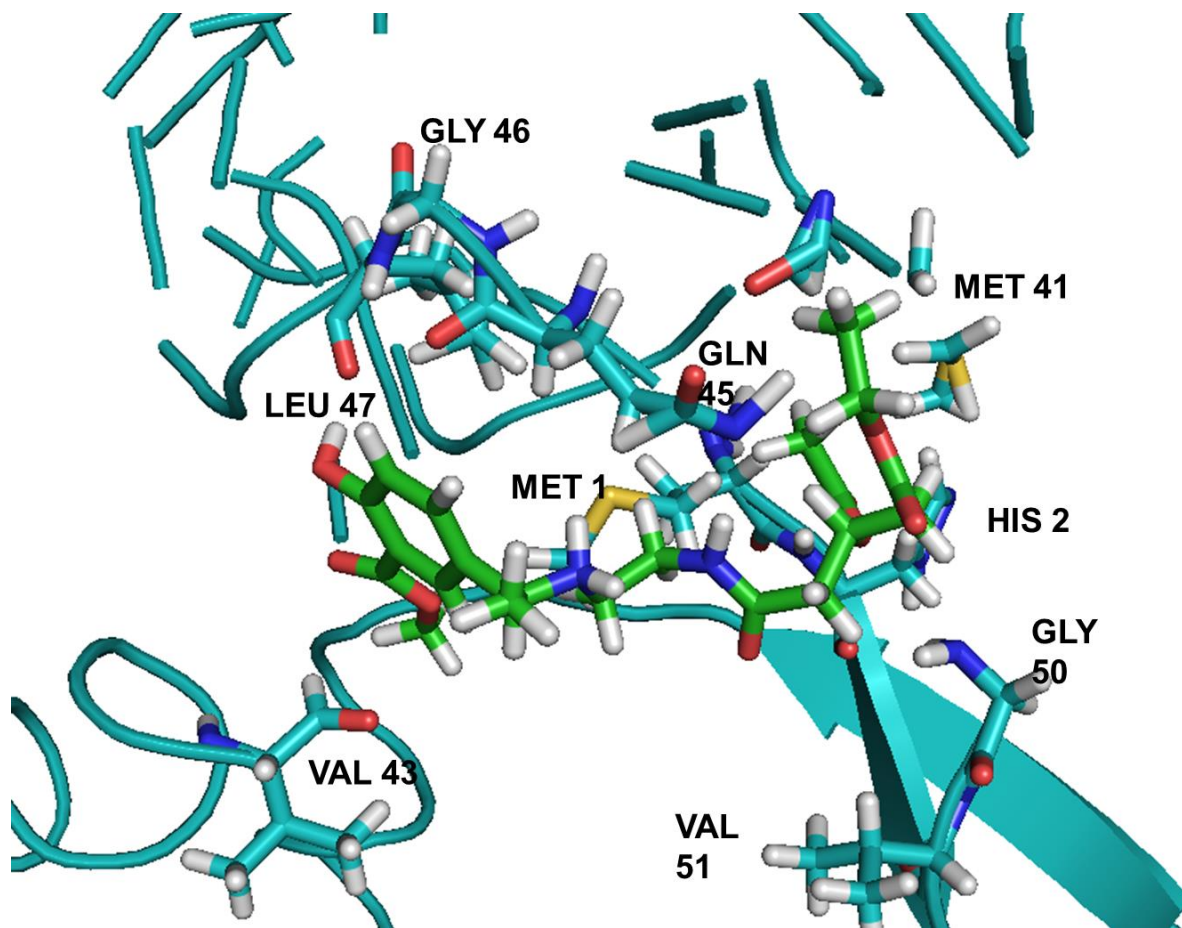

Docking pose Compound 9



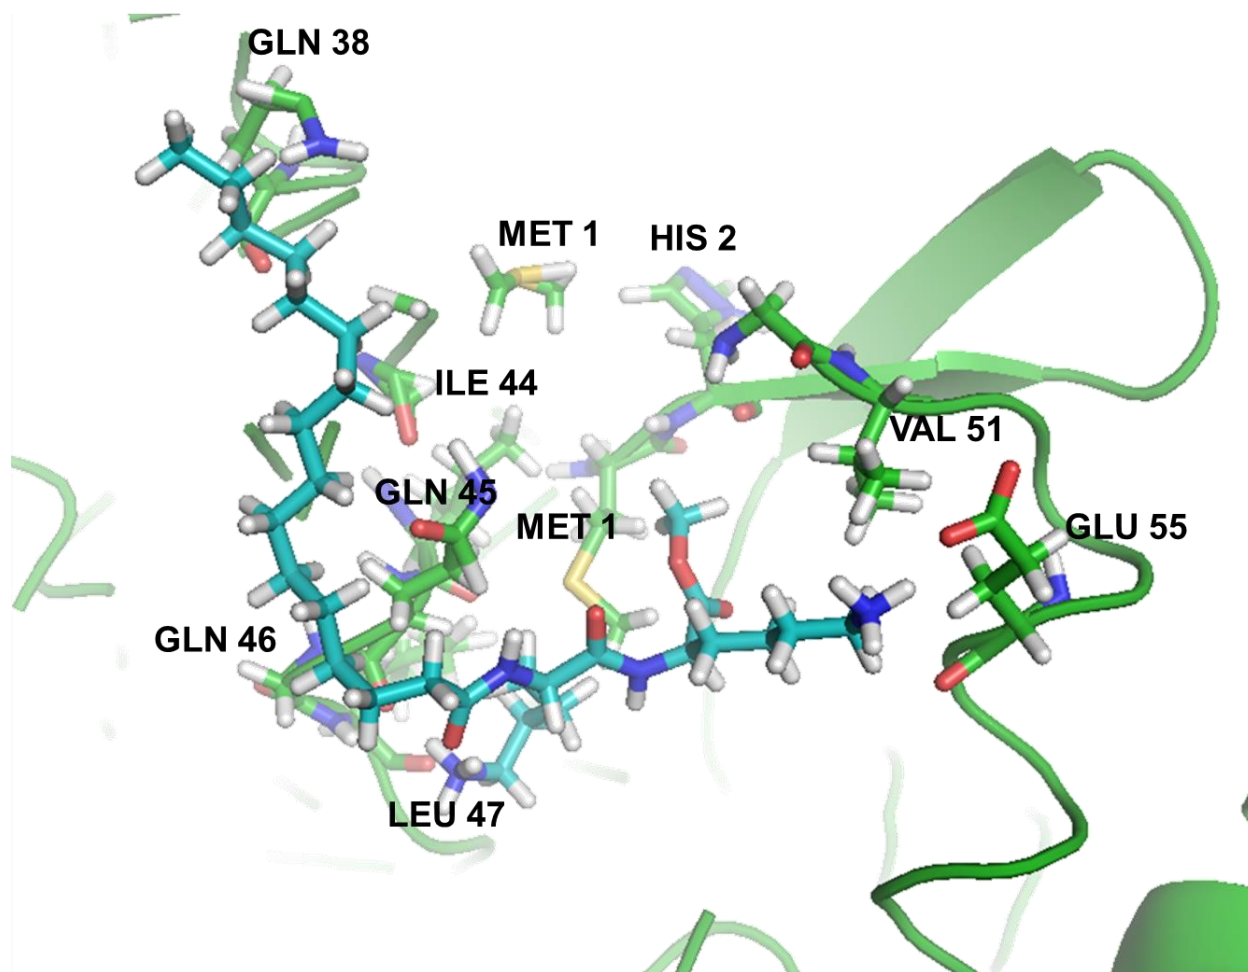

Docking pose Compound **10**

**Figure S4. Docking poses of Compounds 1-10.** All compounds in Table 1 are shown docked to the M-site. Conserved interactions with Ile 44, Gln 45, Met 1, His 2, Val 51, and Val 43 indicate a consensus binding site.

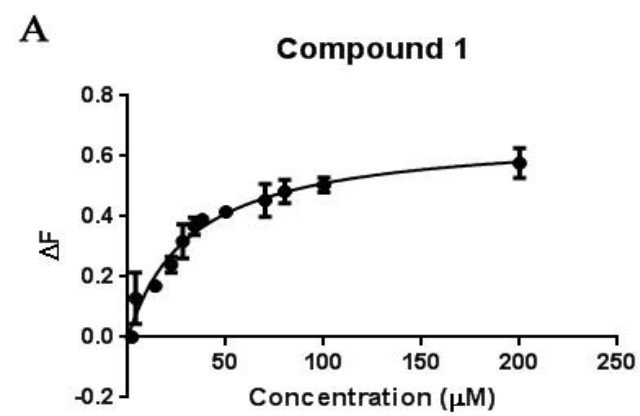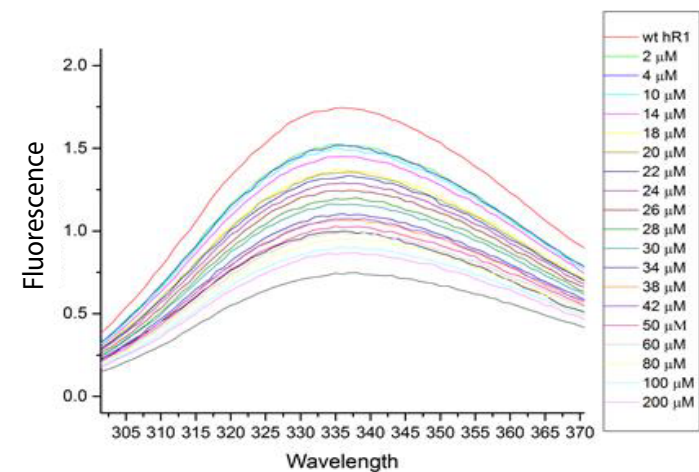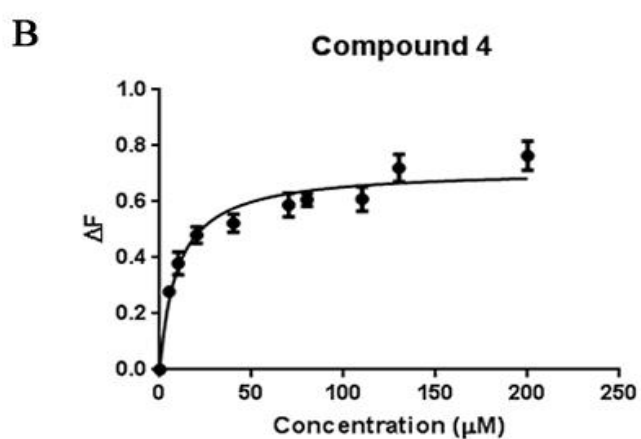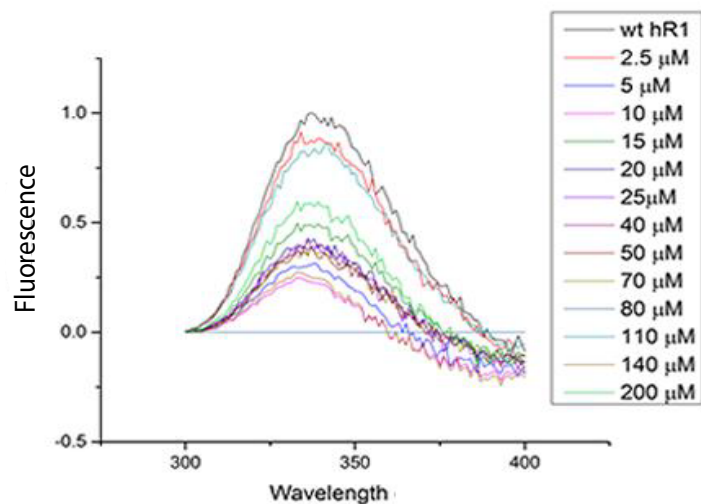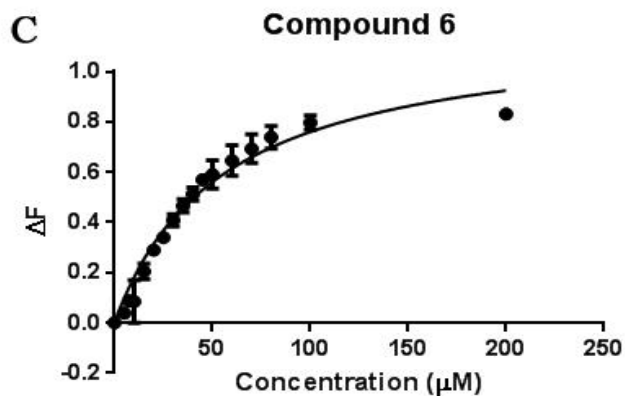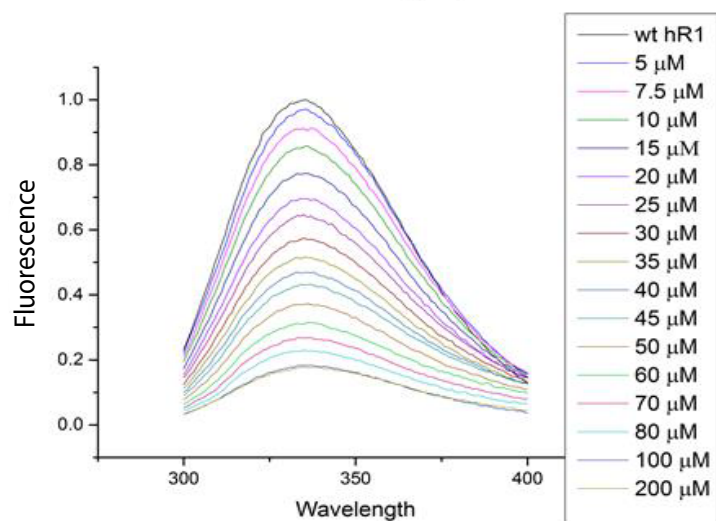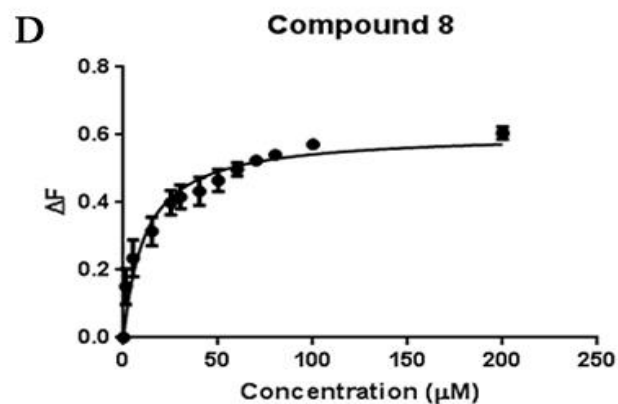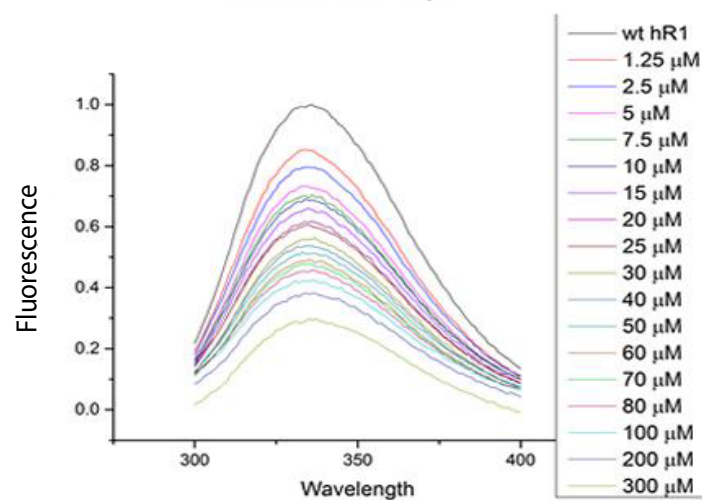

**Figure S5.  $K_D$  determination of Compound 1, 4, 6, and 10 by fluorescence quenching.** A.  $\Delta F$  plot and absorbance curves for Compound **1**,  $K_D$  determined to be  $35.55 \pm 3.57$ . B.  $\Delta F$  plot and absorbance curves for Compound **4**,  $K_D$  determined to be  $9.69 \pm 2.11$ . C.  $\Delta F$  plot and absorbance curves for Compound **6**,  $K_D$  determined to be  $55.29 \pm 8.25$ . D.  $\Delta F$  plot and absorbance curves for Compound **8**,  $K_D$  determined to be  $10.82 \pm 1.86$ .

## References

1. Fairman, J. W.; Wijerathna, S. R.; Ahmad, M. F.; Xu, H.; Nakano, R.; Jha, S.; Prendergast, J.; Welin, R. M.; Flodin, S.; Roos, A.; Nordlund, P.; Li, Z.; Walz, T.; Dealwis, C. G., Structural basis for allosteric regulation of human ribonucleotide reductase by nucleotide-induced oligomerization. *Nat Struct Mol Biol* **2011**, *18* (3), 316-22.
2. (a) Halgren, T. A.; Murphy, R. B.; Friesner, R. A.; Beard, H. S.; Frye, L. L.; Pollard, W. T.; Banks, J. L., Glide: a new approach for rapid, accurate docking and scoring. 2. Enrichment factors in database screening. *Journal of medicinal chemistry* **2004**, *47* (7), 1750-9; (b) Friesner, R. A.; Banks, J. L.; Murphy, R. B.; Halgren, T. A.; Klicic, J. J.; Mainz, D. T.; Repasky, M. P.; Knoll, E. H.; Shelley, M.; Perry, J. K.; Shaw, D. E.; Francis, P.; Shenkin, P. S., Glide: a new approach for rapid, accurate docking and scoring. 1. Method and assessment of docking accuracy. *Journal of medicinal chemistry* **2004**, *47* (7), 1739-49; (c) Friesner, R. A.; Murphy, R. B.; Repasky, M. P.; Frye, L. L.; Greenwood, J. R.; Halgren, T. A.; Sanschagrin, P. C.; Mainz, D. T., Extra precision glide: docking and scoring incorporating a model of hydrophobic enclosure for protein-ligand complexes. *Journal of medicinal chemistry* **2006**, *49* (21), 6177-96.
3. Wang, J.; Lohman, G. J.; Stubbe, J., Enhanced subunit interactions with gemcitabine-5'-diphosphate inhibit ribonucleotide reductases. *Proc Natl Acad Sci U S A* **2007**, *104* (36), 14324-9.
4. Gao, L.; Xu, Y.; Meng, S.; Wu, Y.; Huang, H.; Su, R.; Zhao, L., Identification of the putative specific pathogenic genes of *Porphyromonas gingivalis* with type II fimbriae. *DNA Cell Biol.* **2012**, *31* (6), 1027-1037.
5. Shipps, G. W., Jr.; Huang, X.; Deng, Y.; Zhu, L.; Cooper, A. B.; Sun, B.; Achab, A. A.; Lo, S.-M. Preparation of indazole derivatives as ERK inhibitors useful in the treatment of cancer. WO2012087772A1, 2012.
6. Minor, W.; Tomchick, D.; Otwinowski, Z., Strategies for macromolecular synchrotron crystallography. *Structure Fold Des* **2000**, *8* (5), R105-10.
7. Emsley, P.; Cowtan, K., Coot: model-building tools for molecular graphics. *Acta Crystallogr D Biol Crystallogr* **2004**, *60* (Pt 12 Pt 1), 2126-32.
8. (a) Murshudov, G. N.; Vagin, A. A.; Dodson, E. J., Refinement of macromolecular structures by the maximum-likelihood method. *Acta Crystallogr D Biol Crystallogr* **1997**, *53* (Pt 3), 240-55; (b) Adams, P. D.; Afonine, P. V.; Bunkoczi, G.; Chen, V. B.; Davis, I. W.; Echols, N.; Headd, J. J.; Hung, L. W.; Kapral, G. J.; Grosse-Kunstleve, R. W.; McCoy, A. J.; Moriarty, N. W.; Oeffner, R.; Read, R. J.; Richardson, D. C.;

- Richardson, J. S.; Terwilliger, T. C.; Zwart, P. H., PHENIX: a comprehensive Python-based system for macromolecular structure solution. *Acta Crystallogr D Biol Crystallogr* **66** (Pt 2), 213-21.
9. Laskowski, R. A., MacArthur, M. W., Moss, D. M., and J. M. Thornton., *PROCHECK*: a program to check the stereochemical quality of protein structures. *Appl. Crystallogr.* **1993**, *26*, 283-290.
10. Adams, P. D.; Gopal, K.; Grosse-Kunstleve, R. W.; Hung, L. W.; Ioerger, T. R.; McCoy, A. J.; Moriarty, N. W.; Pai, R. K.; Read, R. J.; Romo, T. D.; Sacchettini, J. C.; Sauter, N. K.; Storoni, L. C.; Terwilliger, T. C., Recent developments in the PHENIX software for automated crystallographic structure determination. *J Synchrotron Radiat* **2004**, *11* (Pt 1), 53-5.
11. DeLano, W. L. *The Pymol Molecular Graphics System*, DeLano Scientific: San Carlos, 2002.
12. Fairman, J. W.; Wijerathna, S. R.; Ahmad, M. F.; Xu, H.; Nakano, R.; Jha, S.; Prendergast, J.; Welin, R. M.; Flodin, S.; Roos, A.; Nordlund, P.; Li, Z.; Walz, T.; Dealwis, C. G., Structural basis for allosteric regulation of human ribonucleotide reductase by nucleotide-induced oligomerization. *Nature structural & molecular biology* **2011**, *18* (3), 316-22.
